# Supplementary material for: Foot-and-mouth disease virus VP1 promotes viral replication by regulating the expression of chemokines and GBP1
Source: Front Vet Sci. 2022 Jul 22;9:937409. doi: 10.3389/fvets.2022.937409 (PMC9353127; doi:10.3389/fvets.2022.937409)
Supplement: Supplementary file 1 [file Table_1.XLSX]

## Sheet: GO siginificent
Table S1 GO functional significant enrichment
Category	GOID	Description	GeneRatio	BgRatio	pvalue	padj	geneID	geneName	Count
CC	GO:0099513	polymeric cytoskeletal fiber	14/170	28/1045	2.72e-05	0.00284319	733594/733686/397266/100126859/414388/494463/396955/100037999/100520304/100135051/100145887/100151836/397592/100627920	TUBA1B/TUBB/BIRC5/LMNA/TPM3/STMN1/AURKB/TPM1/DNAL4/TUBA1A/ARHGEF2/SELENOS/JUP/SARM1	14
CC	GO:0005874	microtubule	10/170	16/1045	3.34e-05	0.00284319	733594/733686/397266/494463/396955/100520304/100135051/100145887/100151836/100627920	TUBA1B/TUBB/BIRC5/STMN1/AURKB/DNAL4/TUBA1A/ARHGEF2/SELENOS/SARM1	10
CC	GO:0000228	nuclear chromosome	10/170	17/1045	6.99e-05	0.00302409	397130/445521/396611/396955/396913/396917/768099/397260/100144450/733648	HMGB2/HMGB1/IRF1/AURKB/JUN/TOP2A/TFIP11/SMAD3/PPP1R10/STAT3	10
CC	GO:0044427	chromosomal part	14/170	30/1045	7.27e-05	0.00302409	397130/397266/445521/396611/100524500/397088/396955/397276/396913/100144492/768099/397260/100144450/733648	HMGB2/BIRC5/HMGB1/IRF1/HMGN2/PPP2R1A/AURKB/TP53/JUN/CDK4/TFIP11/SMAD3/PPP1R10/STAT3	14
CC	GO:0005694	chromosome	15/170	34/1045	8.89e-05	0.00302409	397130/397266/445521/396611/100524500/397088/396955/397276/396913/396917/100144492/768099/397260/100144450/733648	HMGB2/BIRC5/HMGB1/IRF1/HMGN2/PPP2R1A/AURKB/TP53/JUN/TOP2A/CDK4/TFIP11/SMAD3/PPP1R10/STAT3	15
CC	GO:0000785	chromatin	10/170	19/1045	0.000245482	0.00646357	397130/445521/396611/100524500/397276/396913/100144492/397260/100144450/733648	HMGB2/HMGB1/IRF1/HMGN2/TP53/JUN/CDK4/SMAD3/PPP1R10/STAT3	10
CC	GO:0044454	nuclear chromosome part	9/170	16/1045	0.000266147	0.00646357	397130/445521/396611/396955/396913/768099/397260/100144450/733648	HMGB2/HMGB1/IRF1/AURKB/JUN/TFIP11/SMAD3/PPP1R10/STAT3	9
CC	GO:0015630	microtubule cytoskeleton	14/170	36/1045	0.000761622	0.0161845	733594/733686/397266/397379/494463/780428/396955/100520304/100135051/396917/100145887/100151836/100627920/100153563	TUBA1B/TUBB/BIRC5/CDC20/STMN1/CDC42/AURKB/DNAL4/TUBA1A/TOP2A/ARHGEF2/SELENOS/SARM1/CCHCR1	14
CC	GO:0031974	membrane-enclosed lumen	34/170	129/1045	0.00120133	0.016965	397130/100126859/445521/100381266/768117/396611/768109/397442/445532/100101926/445517/100038009/100515785/396968/397044/110256499/396955/397276/397012/100153950/100157985/396913/396917/100144452/414403/100144492/768099/397260/399539/100144450/100156925/397039/733648/100154319	HMGB2/LMNA/HMGB1/CALR/SRSF2/IRF1/SNRPA/THOP1/CFL1/EIF4A3/RNH1/SELENOF/ETFDH/GOT2/SUMO2/U2AF1/AURKB/TP53/HADHA/BAG6/RNASET2/JUN/TOP2A/ABCF1/POLR2I/CDK4/TFIP11/SMAD3/SUCLG1/PPP1R10/IMPAD1/MDH2/STAT3/SOD2	34
CC	GO:0043233	organelle lumen	34/170	129/1045	0.00120133	0.016965	397130/100126859/445521/100381266/768117/396611/768109/397442/445532/100101926/445517/100038009/100515785/396968/397044/110256499/396955/397276/397012/100153950/100157985/396913/396917/100144452/414403/100144492/768099/397260/399539/100144450/100156925/397039/733648/100154319	HMGB2/LMNA/HMGB1/CALR/SRSF2/IRF1/SNRPA/THOP1/CFL1/EIF4A3/RNH1/SELENOF/ETFDH/GOT2/SUMO2/U2AF1/AURKB/TP53/HADHA/BAG6/RNASET2/JUN/TOP2A/ABCF1/POLR2I/CDK4/TFIP11/SMAD3/SUCLG1/PPP1R10/IMPAD1/MDH2/STAT3/SOD2	34
CC	GO:0070013	intracellular organelle lumen	34/170	129/1045	0.00120133	0.016965	397130/100126859/445521/100381266/768117/396611/768109/397442/445532/100101926/445517/100038009/100515785/396968/397044/110256499/396955/397276/397012/100153950/100157985/396913/396917/100144452/414403/100144492/768099/397260/399539/100144450/100156925/397039/733648/100154319	HMGB2/LMNA/HMGB1/CALR/SRSF2/IRF1/SNRPA/THOP1/CFL1/EIF4A3/RNH1/SELENOF/ETFDH/GOT2/SUMO2/U2AF1/AURKB/TP53/HADHA/BAG6/RNASET2/JUN/TOP2A/ABCF1/POLR2I/CDK4/TFIP11/SMAD3/SUCLG1/PPP1R10/IMPAD1/MDH2/STAT3/SOD2	34
CC	GO:0099080	supramolecular complex	15/170	42/1045	0.00139712	0.016965	733594/733686/397266/100126859/396579/414388/494463/396955/100037999/100520304/100135051/100145887/100151836/397592/100627920	TUBA1B/TUBB/BIRC5/LMNA/TNNT1/TPM3/STMN1/AURKB/TPM1/DNAL4/TUBA1A/ARHGEF2/SELENOS/JUP/SARM1	15
CC	GO:0099081	supramolecular polymer	15/170	42/1045	0.00139712	0.016965	733594/733686/397266/100126859/396579/414388/494463/396955/100037999/100520304/100135051/100145887/100151836/397592/100627920	TUBA1B/TUBB/BIRC5/LMNA/TNNT1/TPM3/STMN1/AURKB/TPM1/DNAL4/TUBA1A/ARHGEF2/SELENOS/JUP/SARM1	15
CC	GO:0099512	supramolecular fiber	15/170	42/1045	0.00139712	0.016965	733594/733686/397266/100126859/396579/414388/494463/396955/100037999/100520304/100135051/100145887/100151836/397592/100627920	TUBA1B/TUBB/BIRC5/LMNA/TNNT1/TPM3/STMN1/AURKB/TPM1/DNAL4/TUBA1A/ARHGEF2/SELENOS/JUP/SARM1	15
CC	GO:0043234	protein complex	38/170	154/1045	0.00234031	0.025432	397266/100153387/396579/100381266/396975/100101926/100037921/733588/445517/100154317/397035/100515785/780428/110256499/396955/397276/733658/100153950/396913/100520304/397572/396917/100145887/100523423/397600/100144492/100125954/100037978/100155082/397211/100627128/100125960/397592/397260/397522/397659/574054/733648	BIRC5/SLA-DQA1/TNNT1/CALR/PSMB8/EIF4A3/SLA-DQB1/GNA11/RNH1/CCT3/FTL/ETFDH/CDC42/U2AF1/AURKB/TP53/RTCB/BAG6/JUN/DNAL4/PSME1/TOP2A/ARHGEF2/ATP5D/GATA6/CDK4/COPS6/C2H19orf70/GON7/CSNK2B/FH/COPS4/JUP/SMAD3/PSME2/VDAC2/ATP5G1/STAT3	38
CC	GO:0044430	cytoskeletal part	20/170	66/1045	0.0023936	0.025432	733594/733686/397266/100126859/110256017/396579/397379/414388/494463/780428/396955/100037999/100520304/100135051/396917/100145887/100151836/397592/100627920/100153563	TUBA1B/TUBB/BIRC5/LMNA/LASP1/TNNT1/CDC20/TPM3/STMN1/CDC42/AURKB/TPM1/DNAL4/TUBA1A/TOP2A/ARHGEF2/SELENOS/JUP/SARM1/CCHCR1	20
CC	GO:0044428	nuclear part	30/170	115/1045	0.00292983	0.0290041	397130/100126859/445521/397379/768117/396611/768109/445532/100101926/445517/397051/397044/110256499/396955/397276/100153950/396913/396917/100144452/414403/100144492/100125954/768099/397211/100125960/397592/397260/100144450/100156925/733648	HMGB2/LMNA/HMGB1/CDC20/SRSF2/IRF1/SNRPA/CFL1/EIF4A3/RNH1/DNASE1/SUMO2/U2AF1/AURKB/TP53/BAG6/JUN/TOP2A/ABCF1/POLR2I/CDK4/COPS6/TFIP11/CSNK2B/COPS4/JUP/SMAD3/PPP1R10/IMPAD1/STAT3	30
CC	GO:0031981	nuclear lumen	24/170	86/1045	0.00307102	0.0290041	397130/100126859/445521/768117/396611/768109/445532/100101926/445517/397044/110256499/396955/397276/100153950/396913/396917/100144452/414403/100144492/768099/397260/100144450/100156925/733648	HMGB2/LMNA/HMGB1/SRSF2/IRF1/SNRPA/CFL1/EIF4A3/RNH1/SUMO2/U2AF1/AURKB/TP53/BAG6/JUN/TOP2A/ABCF1/POLR2I/CDK4/TFIP11/SMAD3/PPP1R10/IMPAD1/STAT3	24
CC	GO:0000790	nuclear chromatin	6/170	11/1045	0.00385666	0.034507	397130/445521/396611/396913/397260/733648	HMGB2/HMGB1/IRF1/JUN/SMAD3/STAT3	6
CC	GO:0031090	organelle membrane	59/207	176/1045	1.52366e-06	0.000271212	808507/808506/808503/808510/808512/808511/808504/808502/397545/397492/100738545/100144446/808508/397651/404693/396922/407773/100270821/397591/595103/414799/100157162/397025/403334/733610/100049699/397085/397056/595112/396733/445531/100144499/494014/768111/448985/808509/397018/397674/396893/100144536/100512176/100154394/397472/449572/397567/397345/396592/100337660/397116/733605/733576/100144481/73…	COX3/ATP6/COX1/ND4/ND6/ND5/COX2/ND2/MFGE8/DPP4/GALNT1/HMGCR/ND3/VDAC3/CAV1/CD46/AQP1/LEPROT/NPC1/PLIN3/CYB5A/GLUD1/CLU/CYP51/TMEM59/SFXN1/MYO6/RHBG/RAB14/GGTA1P/ATP6V1A/RAB5A/PRNP/SCGN/CYP7A1/ND4L/SCARB1/CAMK2D/MX2/VAPB/TMEM14A/ROMO1/ATP6V1H/GBA/MGST1/ADAM10/TSPO/COPB1/UCP3/NDUFB6/BECN1/ITM2C/ATP5O/RAB27A/B3GNT5/ABCG2/SPAST/GAL3ST2/ATP8	59
CC	GO:0031982	vesicle	56/207	184/1045	9.33329e-05	0.00553464	808504/397545/397492/397157/397087/404693/396922/100270821/399538/397591/100521561/397378/595103/397028/414799/396658/397414/397025/100124377/733610/397062/397085/397011/397056/595112/396733/397127/100144499/494014/768111/445516/397018/100144498/396898/414420/100519689/397364/397623/100337660/733576/100144481/100512341/102164419/397618/503700/606749/397664/397351/397605/100125540/396984/396584/39…	COX2/MFGE8/DPP4/VEGFA/SPP1/CAV1/CD46/LEPROT/PRDX6/NPC1/CMPK1/PPP1CB/PLIN3/HSP90AA1/CYB5A/IFNAR1/ACP5/CLU/SLC44A4/TMEM59/TFRC/MYO6/OPTN/RHBG/RAB14/GGTA1P/ESD/RAB5A/PRNP/SCGN/DSTN/SCARB1/RAB3A/ATP1B1/RPS28/LRP2/OPRL1/SIGLEC1/COPB1/BECN1/ITM2C/LOC100512341/SLC2A1/OXSR1/PIK3C3/RAB27A/TPT1/HPRT1/RACK1/SYK/DAD1/SPAST/COASY/VCL/SCG5/HSPB1	56
CC	GO:0016020	membrane	117/207	469/1045	0.000119162	0.00553464	808507/808506/808503/808510/808512/808511/808504/808502/397564/397545/396670/397492/397157/100738545/100144446/808508/397651/396590/397092/397112/404693/396922/407773/100270821/397376/399538/100620392/397591/450248/595103/397028/396723/397520/595127/396719/414799/396658/654326/100157162/397025/403334/100124377/733610/100049699/397201/100170127/397062/397085/100192435/397056/595112/396733/10015310…	COX3/ATP6/COX1/ND4/ND6/ND5/COX2/ND2/HBEGF/MFGE8/SCD/DPP4/VEGFA/GALNT1/HMGCR/ND3/VDAC3/MSMO1/OXTR/TBXAS1/CAV1/CD46/AQP1/LEPROT/SLC5A4/PRDX6/DAG1/NPC1/P2RY2/PLIN3/HSP90AA1/DDX58/ANPEP/ARL6IP5/SORBS2/CYB5A/IFNAR1/RNF19A/GLUD1/CLU/CYP51/SLC44A4/TMEM59/SFXN1/JAK2/INSIG2/TFRC/MYO6/ERO1A/RHBG/RAB14/GGTA1P/BVES/PRKACB/ATP6V1A/ENPP6/RAB5A/PRNP/CYCS/SCGN/CYP7A1/ND4L/SLC4A4/SELENOK/SCARB1/CAMK2D/RAB3A/MX2/T…	117
CC	GO:0070469	respiratory chain	11/207	18/1045	0.000124374	0.00553464	808507/808503/808510/808512/808511/808504/808502/808508/100170131/808509/733605	COX3/COX1/ND4/ND6/ND5/COX2/ND2/ND3/CYCS/ND4L/NDUFB6	11
CC	GO:0044446	intracellular organelle part	106/207	418/1045	0.000178195	0.00634375	808507/808506/808503/808510/808512/808511/808504/396648/808502/397545/396670/397492/100738545/100144446/808508/397651/396590/397112/404693/396922/407773/100270821/100620392/397591/100521561/397378/595103/595127/414799/654326/100157162/397025/403334/733610/100049699/397201/100170127/397085/397011/100192435/397056/595112/733651/396733/445531/100144499/494014/100170131/768111/448985/808509/445516/73…	COX3/ATP6/COX1/ND4/ND6/ND5/COX2/HSP70.2/ND2/MFGE8/SCD/DPP4/GALNT1/HMGCR/ND3/VDAC3/MSMO1/TBXAS1/CAV1/CD46/AQP1/LEPROT/DAG1/NPC1/CMPK1/PPP1CB/PLIN3/ARL6IP5/CYB5A/RNF19A/GLUD1/CLU/CYP51/TMEM59/SFXN1/JAK2/INSIG2/MYO6/OPTN/ERO1A/RHBG/RAB14/ZRANB2/GGTA1P/ATP6V1A/RAB5A/PRNP/CYCS/SCGN/CYP7A1/ND4L/DSTN/SELENOK/SCARB1/CAMK2D/MX2/FBXO32/RPS20/VAPB/TMEM14A/ROMO1/ATP6V1H/MAGED1/GBA/RPS28/LRP2/MYC/MGST1/ADAM10…	106
CC	GO:0044422	organelle part	106/207	425/1045	0.000408912	0.0121311	808507/808506/808503/808510/808512/808511/808504/396648/808502/397545/396670/397492/100738545/100144446/808508/397651/396590/397112/404693/396922/407773/100270821/100620392/397591/100521561/397378/595103/595127/414799/654326/100157162/397025/403334/733610/100049699/397201/100170127/397085/397011/100192435/397056/595112/733651/396733/445531/100144499/494014/100170131/768111/448985/808509/445516/73…	COX3/ATP6/COX1/ND4/ND6/ND5/COX2/HSP70.2/ND2/MFGE8/SCD/DPP4/GALNT1/HMGCR/ND3/VDAC3/MSMO1/TBXAS1/CAV1/CD46/AQP1/LEPROT/DAG1/NPC1/CMPK1/PPP1CB/PLIN3/ARL6IP5/CYB5A/RNF19A/GLUD1/CLU/CYP51/TMEM59/SFXN1/JAK2/INSIG2/MYO6/OPTN/ERO1A/RHBG/RAB14/ZRANB2/GGTA1P/ATP6V1A/RAB5A/PRNP/CYCS/SCGN/CYP7A1/ND4L/DSTN/SELENOK/SCARB1/CAMK2D/MX2/FBXO32/RPS20/VAPB/TMEM14A/ROMO1/ATP6V1H/MAGED1/GBA/RPS28/LRP2/MYC/MGST1/ADAM10…	106
CC	GO:0044425	membrane part	95/207	373/1045	0.0004785	0.0121416	808507/808506/808503/808510/808512/808511/808504/808502/397564/396670/397492/100738545/100144446/808508/397651/396590/397092/397112/404693/396922/407773/100270821/397376/100620392/397591/450248/396723/397520/595127/396719/414799/396658/654326/403334/100124377/733610/100049699/397201/100170127/397062/397085/100192435/397056/396733/100153106/445531/100152050/100144499/494014/100170131/448985/808509…	COX3/ATP6/COX1/ND4/ND6/ND5/COX2/ND2/HBEGF/SCD/DPP4/GALNT1/HMGCR/ND3/VDAC3/MSMO1/OXTR/TBXAS1/CAV1/CD46/AQP1/LEPROT/SLC5A4/DAG1/NPC1/P2RY2/DDX58/ANPEP/ARL6IP5/SORBS2/CYB5A/IFNAR1/RNF19A/CYP51/SLC44A4/TMEM59/SFXN1/JAK2/INSIG2/TFRC/MYO6/ERO1A/RHBG/GGTA1P/BVES/ATP6V1A/ENPP6/RAB5A/PRNP/CYCS/CYP7A1/ND4L/SLC4A4/SELENOK/SCARB1/CAMK2D/TSPAN9/VAPB/TMEM14A/ROMO1/IL6R/EPCAM/ATP6V1H/ATP1B1/LRP2/OPRL1/SIGLEC1/M…	95
CC	GO:0098805	whole membrane	29/207	83/1045	0.000545691	0.0121416	397545/397492/100144446/397651/404693/396922/100270821/397591/595103/733610/397085/595112/100153106/445531/100144499/494014/768111/397018/397472/449572/100519689/397623/397567/100337660/733576/100144481/100512341/606749/100518636	MFGE8/DPP4/HMGCR/VDAC3/CAV1/CD46/LEPROT/NPC1/PLIN3/TMEM59/MYO6/RAB14/BVES/ATP6V1A/RAB5A/PRNP/SCGN/SCARB1/ATP6V1H/GBA/LRP2/SIGLEC1/MGST1/COPB1/BECN1/ITM2C/LOC100512341/RAB27A/GJA1	29
CC	GO:0005765	lysosomal membrane	8/207	13/1045	0.00107674	0.0155508	397492/397591/733610/445531/397018/397472/449572/100144481	DPP4/NPC1/TMEM59/ATP6V1A/SCARB1/ATP6V1H/GBA/ITM2C	8
CC	GO:0098852	lytic vacuole membrane	8/207	13/1045	0.00107674	0.0155508	397492/397591/733610/445531/397018/397472/449572/100144481	DPP4/NPC1/TMEM59/ATP6V1A/SCARB1/ATP6V1H/GBA/ITM2C	8
CC	GO:0005768	endosome	16/207	38/1045	0.00113094	0.0155508	404693/100270821/397591/595103/396658/733610/397011/595112/100144499/100519689/397623/733576/503700/606749/397664/396584	CAV1/LEPROT/NPC1/PLIN3/IFNAR1/TMEM59/OPTN/RAB14/RAB5A/LRP2/SIGLEC1/BECN1/PIK3C3/RAB27A/TPT1/SPAST	16
CC	GO:0005773	vacuole	18/207	45/1045	0.00114438	0.0155508	397492/399538/397591/396658/397414/733610/397569/397011/445531/397018/397472/449572/397623/733576/100144481/503700/606749/100518636	DPP4/PRDX6/NPC1/IFNAR1/ACP5/TMEM59/CTSK/OPTN/ATP6V1A/SCARB1/ATP6V1H/GBA/SIGLEC1/BECN1/ITM2C/PIK3C3/RAB27A/GJA1	18
CC	GO:0031966	mitochondrial membrane	25/207	71/1045	0.00120093	0.0155508	808507/808506/808503/808510/808512/808511/808504/808502/808508/397651/100157162/397025/100049699/808509/396893/100512176/100154394/397567/396592/397116/733605/733576/733678/397073/808505	COX3/ATP6/COX1/ND4/ND6/ND5/COX2/ND2/ND3/VDAC3/GLUD1/CLU/SFXN1/ND4L/MX2/TMEM14A/ROMO1/MGST1/TSPO/UCP3/NDUFB6/BECN1/ATP5O/ABCG2/ATP8	25
CC	GO:0031410	cytoplasmic vesicle	34/207	107/1045	0.00131046	0.0155508	397545/397492/397157/404693/396922/100270821/397591/595103/397028/396658/397025/733610/397062/397085/397011/397056/595112/397127/100144499/768111/100144498/100519689/397364/397623/100337660/733576/100512341/102164419/503700/606749/397664/100125540/396584/397110	MFGE8/DPP4/VEGFA/CAV1/CD46/LEPROT/NPC1/PLIN3/HSP90AA1/IFNAR1/CLU/TMEM59/TFRC/MYO6/OPTN/RHBG/RAB14/ESD/RAB5A/SCGN/RAB3A/LRP2/OPRL1/SIGLEC1/COPB1/BECN1/LOC100512341/SLC2A1/PIK3C3/RAB27A/TPT1/SYK/SPAST/SCG5	34
CC	GO:0097708	intracellular vesicle	34/207	107/1045	0.00131046	0.0155508	397545/397492/397157/404693/396922/100270821/397591/595103/397028/396658/397025/733610/397062/397085/397011/397056/595112/397127/100144499/768111/100144498/100519689/397364/397623/100337660/733576/100512341/102164419/503700/606749/397664/100125540/396584/397110	MFGE8/DPP4/VEGFA/CAV1/CD46/LEPROT/NPC1/PLIN3/HSP90AA1/IFNAR1/CLU/TMEM59/TFRC/MYO6/OPTN/RHBG/RAB14/ESD/RAB5A/SCGN/RAB3A/LRP2/OPRL1/SIGLEC1/COPB1/BECN1/LOC100512341/SLC2A1/PIK3C3/RAB27A/TPT1/SYK/SPAST/SCG5	34
CC	GO:0005740	mitochondrial envelope	26/207	76/1045	0.00156296	0.017388	808507/808506/808503/808510/808512/808511/808504/808502/808508/397651/100157162/397025/100049699/100170131/808509/396893/100512176/100154394/397567/396592/397116/733605/733576/733678/397073/808505	COX3/ATP6/COX1/ND4/ND6/ND5/COX2/ND2/ND3/VDAC3/GLUD1/CLU/SFXN1/CYCS/ND4L/MX2/TMEM14A/ROMO1/MGST1/TSPO/UCP3/NDUFB6/BECN1/ATP5O/ABCG2/ATP8	26
CC	GO:0005770	late endosome	7/207	11/1045	0.00174288	0.018249	397591/396658/733610/397623/503700/606749/397664	NPC1/IFNAR1/TMEM59/SIGLEC1/PIK3C3/RAB27A/TPT1	7
CC	GO:0005774	vacuolar membrane	8/207	14/1045	0.00208795	0.0195608	397492/397591/733610/445531/397018/397472/449572/100144481	DPP4/NPC1/TMEM59/ATP6V1A/SCARB1/ATP6V1H/GBA/ITM2C	8
CC	GO:0098803	respiratory chain complex	8/207	14/1045	0.00208795	0.0195608	808507/808503/808511/808504/808502/808508/808509/733605	COX3/COX1/ND5/COX2/ND2/ND3/ND4L/NDUFB6	8
CC	GO:0031224	intrinsic component of membrane	76/207	298/1045	0.00265395	0.0236202	808507/808506/808503/808510/808512/808511/808504/808502/397564/396670/397492/100738545/100144446/808508/397651/396590/397092/397112/396922/407773/100270821/397376/100620392/397591/450248/397520/595127/414799/396658/654326/403334/100124377/733610/100049699/100170127/397062/397056/396733/100153106/100152050/494014/808509/503546/733604/397018/768114/100144536/100512176/100154394/399522/403163/396898…	COX3/ATP6/COX1/ND4/ND6/ND5/COX2/ND2/HBEGF/SCD/DPP4/GALNT1/HMGCR/ND3/VDAC3/MSMO1/OXTR/TBXAS1/CD46/AQP1/LEPROT/SLC5A4/DAG1/NPC1/P2RY2/ANPEP/ARL6IP5/CYB5A/IFNAR1/RNF19A/CYP51/SLC44A4/TMEM59/SFXN1/INSIG2/TFRC/RHBG/GGTA1P/BVES/ENPP6/PRNP/ND4L/SLC4A4/SELENOK/SCARB1/TSPAN9/VAPB/TMEM14A/ROMO1/IL6R/EPCAM/ATP1B1/LRP2/OPRL1/SIGLEC1/MGST1/GJC1/TSPO/MET/UCP3/NDUFB6/KCNJ2/ITM2C/SLC2A1/FXYD3/B3GNT5/SLC2A3/RPN2/…	76
CC	GO:0031967	organelle envelope	31/207	100/1045	0.0034273	0.02773	808507/808506/808503/808510/808512/808511/808504/808502/808508/397651/407773/397591/100157162/397025/100049699/397085/494014/100170131/808509/396893/100512176/100154394/397567/396592/397116/733605/733576/733678/397073/396584/808505	COX3/ATP6/COX1/ND4/ND6/ND5/COX2/ND2/ND3/VDAC3/AQP1/NPC1/GLUD1/CLU/SFXN1/MYO6/PRNP/CYCS/ND4L/MX2/TMEM14A/ROMO1/MGST1/TSPO/UCP3/NDUFB6/BECN1/ATP5O/ABCG2/SPAST/ATP8	31
CC	GO:0031975	envelope	31/207	100/1045	0.0034273	0.02773	808507/808506/808503/808510/808512/808511/808504/808502/808508/397651/407773/397591/100157162/397025/100049699/397085/494014/100170131/808509/396893/100512176/100154394/397567/396592/397116/733605/733576/733678/397073/396584/808505	COX3/ATP6/COX1/ND4/ND6/ND5/COX2/ND2/ND3/VDAC3/AQP1/NPC1/GLUD1/CLU/SFXN1/MYO6/PRNP/CYCS/ND4L/MX2/TMEM14A/ROMO1/MGST1/TSPO/UCP3/NDUFB6/BECN1/ATP5O/ABCG2/SPAST/ATP8	31
CC	GO:0044437	vacuolar part	8/207	15/1045	0.00372	0.0283388	397492/397591/733610/445531/397018/397472/449572/100144481	DPP4/NPC1/TMEM59/ATP6V1A/SCARB1/ATP6V1H/GBA/ITM2C	8
CC	GO:0016021	integral component of membrane	74/207	292/1045	0.00382096	0.0283388	808507/808506/808503/808510/808512/808511/808504/808502/397564/396670/397492/100738545/100144446/808508/397651/396590/397092/397112/396922/407773/100270821/397376/100620392/397591/450248/397520/595127/414799/396658/654326/403334/100124377/733610/100049699/100170127/397062/397056/396733/100153106/808509/503546/733604/397018/768114/100144536/100512176/100154394/399522/403163/396898/100519689/397364…	COX3/ATP6/COX1/ND4/ND6/ND5/COX2/ND2/HBEGF/SCD/DPP4/GALNT1/HMGCR/ND3/VDAC3/MSMO1/OXTR/TBXAS1/CD46/AQP1/LEPROT/SLC5A4/DAG1/NPC1/P2RY2/ANPEP/ARL6IP5/CYB5A/IFNAR1/RNF19A/CYP51/SLC44A4/TMEM59/SFXN1/INSIG2/TFRC/RHBG/GGTA1P/BVES/ND4L/SLC4A4/SELENOK/SCARB1/TSPAN9/VAPB/TMEM14A/ROMO1/IL6R/EPCAM/ATP1B1/LRP2/OPRL1/SIGLEC1/MGST1/GJC1/TSPO/MET/UCP3/NDUFB6/KCNJ2/ITM2C/SLC2A1/FXYD3/B3GNT5/SLC2A3/RPN2/ABCG2/DAD1/…	74
CC	GO:0044440	endosomal part	9/207	19/1045	0.00577837	0.0409841	100270821/397591/595103/733610/595112/100144499/100519689/733576/606749	LEPROT/NPC1/PLIN3/TMEM59/RAB14/RAB5A/LRP2/BECN1/RAB27A	9
CC	GO:0000323	lytic vacuole	15/207	40/1045	0.00621668	0.0409841	397492/399538/397591/396658/397414/733610/397569/445531/397018/397472/449572/397623/100144481/606749/100518636	DPP4/PRDX6/NPC1/IFNAR1/ACP5/TMEM59/CTSK/ATP6V1A/SCARB1/ATP6V1H/GBA/SIGLEC1/ITM2C/RAB27A/GJA1	15
CC	GO:0005764	lysosome	15/207	40/1045	0.00621668	0.0409841	397492/399538/397591/396658/397414/733610/397569/445531/397018/397472/449572/397623/100144481/606749/100518636	DPP4/PRDX6/NPC1/IFNAR1/ACP5/TMEM59/CTSK/ATP6V1A/SCARB1/ATP6V1H/GBA/SIGLEC1/ITM2C/RAB27A/GJA1	15
CC	GO:0098588	bounding membrane of organelle	29/207	96/1045	0.00710158	0.0439156	397545/397492/100738545/100144446/397651/404693/396922/100270821/397591/595103/733610/595112/396733/445531/100144499/768111/397018/397674/100144536/397472/449572/397567/397345/100337660/733576/100144481/606749/397599/396666	MFGE8/DPP4/GALNT1/HMGCR/VDAC3/CAV1/CD46/LEPROT/NPC1/PLIN3/TMEM59/RAB14/GGTA1P/ATP6V1A/RAB5A/SCGN/SCARB1/CAMK2D/VAPB/ATP6V1H/GBA/MGST1/ADAM10/COPB1/BECN1/ITM2C/RAB27A/B3GNT5/GAL3ST2	29
CC	GO:0098796	membrane protein complex	18/207	52/1045	0.0074214	0.0439156	808507/808506/808503/808511/808504/808502/808508/397651/100620392/445531/808509/397472/100048959/100337660/733605/733678/100518636/808505	COX3/ATP6/COX1/ND5/COX2/ND2/ND3/VDAC3/DAG1/ATP6V1A/ND4L/ATP6V1H/GJC1/COPB1/NDUFB6/ATP5O/GJA1/ATP8	18
CC	GO:0012505	endomembrane system	56/207	215/1045	0.00756495	0.0439156	397545/396670/397157/100738545/100144446/396590/397087/397112/100144486/404693/396922/407773/100270821/397591/595103/595127/414799/396658/397025/403334/733610/397201/100170127/397085/397011/100192435/595112/396733/100144499/494014/768111/448985/733604/397674/100144498/396893/100144536/100512176/100519689/397623/397567/397345/100337660/733576/100144481/100512341/503700/606749/397664/397599/1001544…	MFGE8/SCD/VEGFA/GALNT1/HMGCR/MSMO1/SPP1/TBXAS1/FOS/CAV1/CD46/AQP1/LEPROT/NPC1/PLIN3/ARL6IP5/CYB5A/IFNAR1/CLU/CYP51/TMEM59/JAK2/INSIG2/MYO6/OPTN/ERO1A/RAB14/GGTA1P/RAB5A/PRNP/SCGN/CYP7A1/SELENOK/CAMK2D/RAB3A/MX2/VAPB/TMEM14A/LRP2/SIGLEC1/MGST1/ADAM10/COPB1/BECN1/ITM2C/LOC100512341/PIK3C3/RAB27A/TPT1/B3GNT5/RPN2/DAD1/SPAST/GAL3ST2/GJA1/SCG5	56
CC	GO:0098800	inner mitochondrial membrane protein complex	10/207	23/1045	0.00767421	0.0439156	808506/808503/808511/808504/808502/808508/808509/733605/733678/808505	ATP6/COX1/ND5/COX2/ND2/ND3/ND4L/NDUFB6/ATP5O/ATP8	10
CC	GO:0098589	membrane region	12/207	30/1045	0.00789494	0.0439156	397492/404693/396922/397085/100153106/100144499/494014/397018/100519689/397623/100512341/100518636	DPP4/CAV1/CD46/MYO6/BVES/RAB5A/PRNP/SCARB1/LRP2/SIGLEC1/LOC100512341/GJA1	12
