# Supplementary material for: Foot-and-mouth disease virus VP1 promotes viral replication by regulating the expression of chemokines and GBP1
Source: Front Vet Sci. 2022 Jul 22;9:937409. doi: 10.3389/fvets.2022.937409 (PMC9353127; doi:10.3389/fvets.2022.937409)
Supplement: Supplementary file 2 [file Table_2.XLSX]

## Sheet: Sheet1
	Table S2 20 KEGG pathway enrichment of differentially expressed genes
KEGGID	Description	GeneRatio	BgRatio	pvalue	padj	geneID	geneName	keggID	Count	Up	Up_Gene_names	Down	Down_Gene_names
ssc05132	Salmonella infection	99/2161	206/6302	2.35e-05	0.00746294	100157773/100126861/100522681/100515528/100144486/100512494/100523621/396742/100522887/100515607/100515138/397028/100623170/100157157/396606/100518997/100521540/397657/100514823/396904/110255928/595105/100153785/780425/396633/100155782/100127166/396609/100135665/110256149/397085/100174964/780428/100512860/100144503/100151740/397244/396913/100513840/100144499/100101471/110260411/100170131/10062419…	DYNLL1/AKT1/PLEKHM2/PKN1/FOS/PFN1/KLC1/HSP90AB1/LOC100522887/GSDMD/S100A10/HSP90AA1/EXOC7/KLC4/IRAK1/FLNC/KLC2/CTNNB1/NLRP3/MYH9/RAC3/CASP8/TAB1/ARF6/BAX/WASF3/IRAK4/MAPK9/RELA/MAP2K3/MYO6/ARPC1B/CDC42/DYNLL2/RHOB/FYCO1/CASP3/JUN/TRAF2/RAB5A/IKBKB/MAPK15/CYCS/DYNC2H1/MAP2K1/BAK1/FLNA/CASP7/ACBD3/TAB3/BIRC3/SNX9/PGAP2/RIPK2/RAB5B/SNX18/CHUK/FHOD1/DYNC1I2/NFKB1/CD14/LOC100737977/MYC/VPS33B/MRLC2/RI…	ssc:100157773/ssc:100126861/ssc:100522681/ssc:100515528/ssc:100144486/ssc:100512494/ssc:100523621/ssc:396742/ssc:100522887/ssc:100515607/ssc:100515138/ssc:397028/ssc:100623170/ssc:100157157/ssc:396606/ssc:100518997/ssc:100521540/ssc:397657/ssc:100514823/ssc:396904/ssc:100627149/ssc:595105/ssc:100153785/ssc:780425/ssc:396633/ssc:100155782/ssc:100127166/ssc:396609/ssc:100135665/ssc:100625946/ssc:39…	99	57	100157773/100126861/100522681/100515528/100512494/100523621/396742/100515607/100515138/396606/100521540/397657/396904/110255928/100153785/780425/396633/100155782/100135665/110256149/100174964/780428/100512860/100144503/100151740/396913/100513840/110260411/397543/733585/100627455/102167025/100518876/100154566/751869/110261556/414399/100153263/100520100/100516558/100154462/100270721/396623/11026100…	42	100144486/100522887/397028/100623170/100157157/100518997/100514823/595105/100127166/396609/397085/397244/100144499/100101471/100170131/100624195/100233191/100156777/494461/100517796/100622590/100518835/100625381/100135662/100524867/100037938/100737977/448810/100049702/397653/396621/503700/100627609/106504059/100517049/100125555/100627149/100157760/100620340/100156182/100513903/100525320
ssc04141	Protein processing in endoplasmic reticulum	76/2161	159/6302	0.000253645	0.0284771	396648/100513186/100519020/396741/100739491/100511986/100381266/100144302/100518376/100524115/100625565/396742/396906/100155766/100522734/100526009/397028/100048931/100153007/100513204/100522168/100511890/100144516/100522951/396633/396609/100524483/100524037/100523288/100217386/100192435/100621635/100511251/397393/100152304/100522203/100513840/100499564/100516197/100738285/396938/780419/397543/10…	HSP70.2/NSFL1C/UBQLN4/DNAJB1/SEC24D/SEC24A/CALR/ATF4/HSPBP1/SEC23B/NPLOC4/HSP90AB1/HSPA6/SEC23A/PREB/STT3B/HSP90AA1/HSPH1/LMAN1/MOGS/DNAJB2/HSPA8/ATF6B/NGLY1/BAX/MAPK9/RAD23A/CUL1/DNAJC10/XBP1/ERO1A/DNAJC5/STUB1/CAPN2/SEC63/PDIA4/TRAF2/PDIA6/AMFR/EDEM1/GANAB/UBE2D1/BAK1/UBE2D4/CAPN1/STT3A/EIF2AK3/DERL3/SSR2/SELENOS/SEC31A/EDEM3/SEC61A1/HERPUD1/UGGT1/CKAP4/UBQLN2/DNAJB12/UGGT2/RPN1/ERLEC1/UBXN6/ER…	ssc:396648/ssc:100513186/ssc:100519020/ssc:396741/ssc:100152996/ssc:100511986/ssc:100381266/ssc:100144302/ssc:100518376/ssc:100524115/ssc:100625565/ssc:396742/ssc:396906/ssc:100155766/ssc:100522734/ssc:100526009/ssc:397028/ssc:100048931/ssc:100153007/ssc:100513204/ssc:100522168/ssc:100511890/ssc:100144516/ssc:100522951/ssc:396633/ssc:396609/ssc:100524483/ssc:100524037/ssc:100523288/ssc:100217386/…	76	36	100513186/100519020/100381266/100144302/100518376/100625565/396742/396906/100522168/100144516/396633/100524483/100524037/100523288/100621635/100511251/397393/100522203/100513840/100499564/100516197/396938/397543/100524597/397027/100511525/100155947/100151836/100523493/110257666/397606/396580/100516540/100153668/100524148/110256099	40	396648/396741/100739491/100511986/100524115/100155766/100522734/100526009/397028/100048931/100153007/100513204/100511890/100522951/396609/100217386/100192435/100152304/100738285/780419/100513348/100154318/100511210/100625293/100155306/100622579/100155117/100156234/100154594/100517335/100524481/100510978/100170772/100154147/100151996/100154432/396984/100511640/100513225/100512008
ssc03040	Spliceosome	66/2161	135/6302	0.000286494	0.0284771	396648/100153480/100157814/100739153/768103/100144769/100514153/100620496/100158042/100511390/100511111/100522004/100156353/100516520/768117/396906/768109/768102/100101926/100512288/100524872/100511890/100628160/100522208/100524846/100624623/100626496/100738028/100516539/100156173/100156573/100624565/100190995/110256499/100154637/100154006/100154606/100518189/100511501/100525328/100739296/1005228…	HSP70.2/SNRPD3/SF3B4/SRSF3/HNRNPA1/PRPF19/HNRNPM/ALYREF/RBMX/RBM25/CDC40/SF3B2/ACIN1/HNRNPA3/SRSF2/HSPA6/SNRPA/SRSF6/EIF4A3/SF3A3/SNRPD1/HSPA8/SNRNP70/EFTUD2/SART1/PRPF6/HNRNPC/CHERP/SF3A2/RBM8A/SNRPA1/PUF60/PRPF3/U2AF1/SRSF9/BCAS2/SNRPC/SRSF7/PCBP1/XAB2/LSM8/LSM6/LSM7/PRPF4/SNRPG/SNRNP40/TRA2B/DHX38/DHX33/U2AF2/SF3A1/PRPF31/DDX46/RBM22/HNRNPK/LSM3/RBM17/PPIL1/SNRPF/PRPF38B/WBP11/SF3B5/LSM5/CTNNB…	ssc:396648/ssc:100153480/ssc:100157814/ssc:100739153/ssc:768103/ssc:100144769/ssc:100514153/ssc:100620496/ssc:100158042/ssc:100511390/ssc:100511111/ssc:100522004/ssc:100156353/ssc:100516520/ssc:768117/ssc:396906/ssc:768109/ssc:768102/ssc:100101926/ssc:100512288/ssc:100524872/ssc:100511890/ssc:100628160/ssc:100522208/ssc:100524846/ssc:100624623/ssc:100626496/ssc:100738028/ssc:100516539/ssc:1001561…	66	61	100153480/100157814/100739153/768103/100144769/100514153/100620496/100158042/100511390/100522004/100156353/100516520/768117/396906/768109/768102/100101926/100512288/100524872/100628160/100522208/100524846/100624623/100626496/100738028/100516539/100156173/100156573/100624565/100190995/110256499/100154637/100154006/100154606/100518189/100511501/100525328/100739296/100522884/100515470/100622501/1005…	5	396648/100511111/100511890/100626833/100154667
ssc04668	TNF signaling pathway	52/2161	103/6302	0.000469477	0.0284771	494019/100126861/100626270/106508765/100144486/100154896/100144302/396611/100628179/396925/595105/397422/100144516/100622156/100153785/396609/100135665/414904/110256149/100156773/100525396/397244/396913/100513840/100101471/110260411/553951/414381/100621789/100233191/100156777/100517796/100622590/100135662/751869/100520468/100153263/100520100/445459/396616/396613/110261009/100037306/397020/406188/…	CXCL10/AKT1/RPS6KA4/PGAM5/FOS/CASP10/ATF4/IRF1/DAB2IP/VCAM1/CASP8/CCL2/ATF6B/TNFAIP3/TAB1/MAPK9/RELA/CXCL2/MAP2K3/JAG1/LOC100525396/CASP3/JUN/TRAF2/IKBKB/MAPK15/CCL20/CFLAR/PIK3CA/MAP2K1/CASP7/TAB3/BIRC3/CHUK/NFKB1/CREB3L2/RIPK3/MAP2K4/IFNB1/TRAF5/CCL5/FOSB/TNFRSF1B/TNFRSF1A/NFKBIA/MAPK11/SOCS3/TRADD/TNF/RIPK1/TAB2/PIK3R2	ssc:494019/ssc:100126861/ssc:100626270/ssc:106508765/ssc:100144486/ssc:100154896/ssc:100144302/ssc:396611/ssc:100628179/ssc:396925/ssc:595105/ssc:397422/ssc:100144516/ssc:100622156/ssc:100153785/ssc:396609/ssc:100135665/ssc:414904/ssc:100625946/ssc:100156773/ssc:100525396/ssc:397244/ssc:396913/ssc:100513840/ssc:100101471/ssc:100153927/ssc:553951/ssc:414381/ssc:100621789/ssc:100233191/ssc:397244/s…	52	34	494019/100126861/100626270/106508765/100144302/396611/100628179/396925/397422/100144516/100622156/100153785/100135665/414904/110256149/100156773/100525396/396913/100513840/110260411/553951/751869/100153263/100520100/445459/396613/110261009/397020/406188/110260605/493186/397086/100524751/100739510	18	100144486/100154896/595105/396609/397244/100101471/414381/100621789/100233191/100156777/100517796/100622590/100135662/100520468/396616/100037306/100620340/100156182
ssc05166	Human T-cell leukemia virus 1 infection	97/2161	215/6302	0.000532991	0.0284771	100524215/100126861/100151896/102164975/100515210/100153387/100520196/100135040/397651/100144486/100381266/100415929/100144302/397379/100153932/110261113/100151828/100621019/100153121/100524070/100037921/102157652/100157729/100153829/100144516/397550/396633/396617/396609/100135665/100152215/100135668/100621206/397241/100525205/100514391/397276/100623628/100514402/397655/100135037/100155743/100519…	KAT2A/AKT1/RANBP1/BUB1B/CDKN2C/SLA-DQA1/LTBR/SLA-DRA/VDAC3/FOS/CALR/CCNA2/ATF4/CDC20/FDPS/E2F2/RB1/ANAPC2/ESPL1/TCF3/SLA-DQB1/MAD1L1/DLG1/NFKB2/ATF6B/STAT5A/BAX/MAP3K1/MAPK9/RELA/CDKN1A/CCNB2/CRTC3/PPP3CA/FOSL1/RANBP3/TP53/PRKACB/ADCY3/RAN/SLA-6/ANAPC7/CRTC2/SLC25A5/JUN/SLA-DMB/IKBKB/JAK3/MAPK15/CDC27/PIK3CA/MAP2K1/CCND3/HRAS/VAC14/ELK4/ANAPC5/PPP3CB/SLA-3/SLA-DMA/CCNE1/TLN1/PTEN/CHUK/GPS2/CDK4/N…	ssc:100524215/ssc:100126861/ssc:100151896/ssc:102164975/ssc:100515210/ssc:100153387/ssc:100520196/ssc:100135040/ssc:397651/ssc:100144486/ssc:100381266/ssc:100415929/ssc:100144302/ssc:397379/ssc:100153932/ssc:100154407/ssc:100151828/ssc:100621019/ssc:100153121/ssc:100524070/ssc:100037921/ssc:102157652/ssc:100157729/ssc:100153829/ssc:100144516/ssc:397550/ssc:396633/ssc:396617/ssc:396609/ssc:1001356…	97	68	100524215/100126861/100151896/102164975/100515210/100153387/100520196/100135040/100381266/100415929/100144302/397379/110261113/100621019/100153121/100524070/100037921/102157652/100153829/100144516/397550/396633/100135665/100135668/100621206/100514391/397276/100514402/397655/100135037/100155743/100519835/100158185/396913/100135050/110260411/780426/110259208/100513600/100152087/396603/100037288/445…	29	397651/100144486/100153932/100151828/100157729/396617/396609/100152215/397241/100525205/100623628/100101471/100518649/100517185/100621789/100233191/100626141/100523248/100157220/100135662/100526021/100520468/100415930/448810/396592/100518619/100520726/100153846/100038004
ssc04620	Toll-like receptor signaling pathway	48/2161	94/6302	0.000550296	0.0284771	396668/494019/100126861/494459/100169744/397087/100144486/397441/396606/110255928/396658/595105/100125828/100625123/396656/100153785/397569/100127166/396609/100135665/110256149/396913/100101471/110260411/100621789/100233191/100519508/100135662/751869/100037938/100520100/396621/445459/396607/396613/396623/110261009/100525505/406188/110256043/100125555/100627149/110260605/397086/100524751/100623776…	CCL4/CXCL10/AKT1/CCL3L1/CXCL11/SPP1/FOS/CD86/IRAK1/RAC3/IFNAR1/CASP8/TBK1/TOLLIP/IRF3/TAB1/CTSK/IRAK4/MAPK9/RELA/MAP2K3/JUN/IKBKB/MAPK15/PIK3CA/MAP2K1/IKBKE/CHUK/NFKB1/CD14/MAP2K4/TLR6/IFNB1/TLR1/CCL5/TLR2/FOSB/MAP2K2/NFKBIA/LOC110256043/LY96/RAC1/MAPK11/TNF/RIPK1/TICAM1/TAB2/PIK3R2	ssc:396668/ssc:494019/ssc:100126861/ssc:494459/ssc:100169744/ssc:397087/ssc:100144486/ssc:397441/ssc:396606/ssc:100627149/ssc:396658/ssc:595105/ssc:100125828/ssc:100625123/ssc:396656/ssc:100153785/ssc:397569/ssc:100127166/ssc:396609/ssc:100135665/ssc:100625946/ssc:396913/ssc:100101471/ssc:100153927/ssc:100621789/ssc:100233191/ssc:100519508/ssc:100135662/ssc:751869/ssc:100037938/ssc:100520100/ssc:…	48	28	396668/494019/100126861/494459/100169744/396606/110255928/100625123/396656/100153785/100135665/110256149/396913/110260411/100519508/751869/100520100/445459/396613/396623/110261009/100525505/406188/110260605/397086/100524751/100623776/100739510	20	397087/100144486/397441/396658/595105/100125828/397569/100127166/396609/100101471/100621789/100233191/100135662/100037938/396621/396607/110256043/100125555/100627149/100156182
ssc05169	Epstein-Barr virus infection	88/2161	193/6302	0.000628831	0.0284771	100512253/494019/100126861/100153387/100627568/100135040/100524330/100621111/100381266/100415929/100621090/110261113/100525720/100151828/733583/396606/396723/100525150/100037921/100190899/110255928/396658/595105/100125828/100153829/100622156/396656/100518663/100153785/396633/100127166/396609/100135665/110256149/100152215/100524394/397363/397276/100135037/397244/396913/733643/100513840/100135050/1…	PSMD3/CXCL10/AKT1/SLA-DQA1/PSMD2/SLA-DRA/SEM1/NFKBIB/CALR/CCNA2/GADD45B/E2F2/SAP30L/RB1/PSMD4/IRAK1/DDX58/CD44/SLA-DQB1/USP7/RAC3/IFNAR1/CASP8/TBK1/NFKB2/TNFAIP3/IRF3/PLCG2/TAB1/BAX/IRAK4/MAPK9/RELA/MAP2K3/CDKN1A/PSMD12/TYK2/TP53/SLA-6/CASP3/JUN/NCOR2/TRAF2/SLA-DMB/IKBKB/JAK3/CYCS/PSMC3/PIK3CA/CCND3/BAK1/CASP7/IKBKE/PSMD13/SLA-3/SLA-DMA/CCNE1/TAPBP/CHUK/CDK4/NFKB1/SLA-2/RELB/NFKBIE/MYC/SIN3A/MAP2…	ssc:100512253/ssc:494019/ssc:100126861/ssc:100153387/ssc:100627568/ssc:100135040/ssc:100155621/ssc:100621111/ssc:100381266/ssc:100415929/ssc:100621090/ssc:100154407/ssc:100525720/ssc:100151828/ssc:733583/ssc:396606/ssc:396723/ssc:100525150/ssc:100037921/ssc:100190899/ssc:100627149/ssc:396658/ssc:595105/ssc:100125828/ssc:100153829/ssc:100622156/ssc:396656/ssc:100518663/ssc:100153785/ssc:396633/ssc…	88	59	100512253/494019/100126861/100153387/100627568/100135040/100524330/100621111/100381266/100415929/100621090/110261113/733583/396606/100037921/100190899/110255928/100153829/100622156/396656/100518663/100153785/396633/100135665/110256149/397363/397276/100135037/396913/733643/100513840/100135050/100512454/780426/397543/100519508/100517815/100037288/445528/100155428/100144492/751869/100135031/10062260…	29	100525720/100151828/396723/100525150/396658/595105/100125828/100127166/396609/100152215/100524394/397244/100101471/100518649/100170131/100621789/100156777/100523248/100135662/100153486/448810/100621221/396616/100153846/100125540/100145895/100627149/100620340/100156182
ssc00564	Glycerophospholipid metabolism	44/2161	87/6302	0.00119213	0.044381	397348/100623089/100519533/110260948/414900/397654/100217397/100170768/100524266/100524423/100312963/100170145/100152836/100621753/100519388/100512419/100233200/100153088/110259207/100625322/100625999/100156253/100514711/100153506/397097/100517106/100511161/100233172/100622701/100152643/100515451/100233171/100526190/100312967/100156809/100170771/100623595/100187579/100523738/110255933/100512584/1…	GPD2/MBOAT2/DGKZ/PLA2G15/PLD2/PEMT/LPCAT1/AGPAT2/GPAT3/PNPLA6/CDIPT/CDS2/GPAT4/PHOSPHO1/ADPRM/PLPP3/PLPP2/CRLS1/PTDSS2/PLD3/PGS1/GNPAT/PLA2G6/PISD/DGKA/PLA2G12A/PLA2G3/AGPAT5/DGKQ/PCYT1B/PLPP1/AGPAT3/DGKD/DGKE/PTDSS1/LPIN3/DGKG/LPIN2/CHPT1/PCYT2/PLA2G16/LYPLA1/GPD1/PNPLA7	ssc:397348/ssc:100152017/ssc:100519533/ssc:100303723/ssc:414900/ssc:397654/ssc:100217397/ssc:100170768/ssc:100524266/ssc:100524423/ssc:100312963/ssc:100170145/ssc:100152836/ssc:100621753/ssc:100519388/ssc:100512419/ssc:100233200/ssc:100153088/ssc:100156809/ssc:100625322/ssc:100625999/ssc:100156253/ssc:100514711/ssc:100153506/ssc:397097/ssc:100517106/ssc:100511161/ssc:100233172/ssc:100622701/ssc:1…	44	24	100519533/110260948/414900/397654/100217397/100170768/100524266/100312963/100152836/100512419/100233200/100153088/110259207/100625999/100153506/397097/100511161/100233171/100156809/100170771/100523738/110255933/100512584/110258066	20	397348/100623089/100524423/100170145/100621753/100519388/100625322/100156253/100514711/100517106/100233172/100622701/100152643/100515451/100526190/100312967/100623595/100187579/100152491/100153250
ssc04210	Apoptosis	64/2161	136/6302	0.00126003	0.044381	100620983/733594/100126861/397266/100126859/100127131/397648/100513342/100621034/100522387/100144486/100621090/100154896/100144302/100628179/100523126/100512831/595105/396633/397569/396609/100135665/397276/397393/397244/100521118/396913/100513840/100101471/397278/110260411/414381/100135051/100170131/100620838/100517403/100621789/100233191/397543/100156777/397027/100622590/110259208/100513348/1001…	LMNB2/TUBA1B/AKT1/BIRC5/LMNA/LOC100127131/MCL1/LMNB1/PARP1/CTSC/FOS/GADD45B/CASP10/ATF4/DAB2IP/DFFA/HTRA2/CASP8/BAX/CTSK/MAPK9/RELA/TP53/CAPN2/CASP3/CASP2/JUN/TRAF2/IKBKB/PMAIP1/MAPK15/CFLAR/TUBA1A/CYCS/PARP3/BBC3/PIK3CA/MAP2K1/BAK1/CASP7/CAPN1/BIRC3/HRAS/EIF2AK3/HRK/CHUK/NFKB1/LOC100737977/ACTG1/ENDOG/ERN1/CTSS/AIFM1/FOSB/MAP2K2/PDPK1/TNFRSF1A/NFKBIA/ITPR1/GADD45A/TRADD/TNF/RIPK1/PIK3R2	ssc:100620983/ssc:733594/ssc:100126861/ssc:397266/ssc:100126859/ssc:100127131/ssc:397648/ssc:100513342/ssc:100621034/ssc:100522387/ssc:100144486/ssc:100621090/ssc:100154896/ssc:100144302/ssc:100628179/ssc:100523126/ssc:100512831/ssc:595105/ssc:396633/ssc:397569/ssc:396609/ssc:100135665/ssc:397276/ssc:397393/ssc:397244/ssc:100521118/ssc:396913/ssc:100513840/ssc:100101471/ssc:397278/ssc:100153927/s…	64	39	100620983/733594/100126861/397266/100126859/100127131/100513342/100621034/100621090/100144302/100628179/100523126/100512831/396633/100135665/397276/397393/100521118/396913/100513840/397278/110260411/100135051/100620838/100517403/397543/397027/110259208/100155596/751869/100514888/110261009/100525505/397020/406188/733669/397086/100524751/100739510	25	397648/100522387/100144486/100154896/595105/397569/396609/397244/100101471/414381/100170131/100621789/100233191/100156777/100622590/100513348/100135662/100737977/397653/100510978/100153090/100524062/100192445/397454/100620340
ssc04657	IL-17 signaling pathway	39/2161	76/6302	0.00156853	0.0461851	494019/100144486/396742/397028/595105/397422/100125828/100622156/396609/100135665/414904/100525396/100525205/100738747/102164433/397244/396913/100513840/100101471/110260411/553951/100157000/396833/100156777/100517796/100519508/100152087/100628105/100135662/100337681/751869/396616/110261009/406188/100126852/110260605/100620340/397086/100156182	CXCL10/FOS/HSP90AB1/HSP90AA1/CASP8/CCL2/TBK1/TNFAIP3/MAPK9/RELA/CXCL2/LOC100525396/FOSL1/EEF1AKMT1/MAPK7/CASP3/JUN/TRAF2/IKBKB/MAPK15/CCL20/TRAF3IP2/MAPK6/CASP7/TAB3/IKBKE/ANAPC5/USP25/CHUK/ELAVL1/NFKB1/TRAF5/FOSB/NFKBIA/GSK3B/MAPK11/TRADD/TNF/TAB2	ssc:494019/ssc:100144486/ssc:396742/ssc:397028/ssc:595105/ssc:397422/ssc:100125828/ssc:100622156/ssc:396609/ssc:100135665/ssc:414904/ssc:100525396/ssc:100525205/ssc:100738902/ssc:102164433/ssc:397244/ssc:396913/ssc:100513840/ssc:100101471/ssc:100153927/ssc:553951/ssc:100157000/ssc:396833/ssc:397244/ssc:100517796/ssc:100519508/ssc:100152087/ssc:100628105/ssc:100135662/ssc:100337681/ssc:751869/ssc:…	39	21	494019/396742/397422/100622156/100135665/414904/100525396/100738747/102164433/396913/100513840/110260411/553951/100519508/100152087/100337681/751869/110261009/406188/110260605/397086	18	100144486/397028/595105/100125828/396609/100525205/397244/100101471/100157000/396833/100156777/100517796/100628105/100135662/396616/100126852/100620340/100156182
ssc04622	RIG-I-like receptor signaling pathway	33/2161	62/6302	0.00160264	0.0461851	494019/100621111/100154896/100622285/396723/100520121/595105/100624053/100125828/396656/396617/396609/100135665/100517591/100524520/100513840/100101471/100518678/110259388/100519508/100135662/751869/100156366/100515940/445459/100624570/406188/100101927/100145895/110260605/100620340/397086/100524751	CXCL10/NFKBIB/CASP10/TRIM25/DDX58/TKFC/CASP8/OTUD5/TBK1/IRF3/MAP3K1/MAPK9/RELA/RNF125/DHX58/TRAF2/IKBKB/NLRX1/DDX41/IKBKE/CHUK/NFKB1/TANK/DDX3X/IFNB1/CYLD/NFKBIA/IFIH1/ISG15/MAPK11/TRADD/TNF/RIPK1	ssc:494019/ssc:100621111/ssc:100154896/ssc:100622285/ssc:396723/ssc:100520121/ssc:595105/ssc:100624053/ssc:100125828/ssc:396656/ssc:396617/ssc:396609/ssc:100135665/ssc:100517591/ssc:100524520/ssc:100513840/ssc:100101471/ssc:100518678/ssc:100515940/ssc:100519508/ssc:100135662/ssc:751869/ssc:100156366/ssc:100515940/ssc:445459/ssc:100624570/ssc:406188/ssc:100101927/ssc:100145895/ssc:100156630/ssc:10…	33	16	494019/100621111/100520121/100624053/396656/100135665/100513840/100518678/110259388/100519508/751869/445459/406188/110260605/397086/100524751	17	100154896/100622285/396723/595105/100125828/396617/396609/100517591/100524520/100101471/100135662/100156366/100515940/100624570/100101927/100145895/100620340
ssc05163	Human cytomegalovirus infection	89/2161	202/6302	0.00216295	0.0571378	396668/100126861/494459/100154056/397157/100621541/100381266/100144302/110261113/100151828/397657/110255928/733588/595105/397422/100157291/100125828/100144516/396656/100525156/396633/397523/100135665/110256149/100152215/100524280/397241/100505408/397276/100623628/110261346/100514402/100135037/397244/100513840/100101471/110260411/100170131/100522824/100625072/100621789/100233191/397543/396838/1001…	CCL4/AKT1/CCL3L1/CALM1/VEGFA/BCAR1/CALR/ATF4/E2F2/RB1/CTNNB1/RAC3/GNA11/CASP8/CCL2/ARHGEF11/TBK1/ATF6B/IRF3/GNA12/BAX/GNAI2/RELA/MAP2K3/CDKN1A/GNB4/PPP3CA/TSC2/TP53/PRKACB/GNB1/ADCY3/SLA-6/CASP3/TRAF2/IKBKB/MAPK15/CYCS/GNA13/PTGER4/PIK3CA/MAP2K1/BAK1/CALM3/CASP7/HRAS/PPP3CB/PTK2B/SLA-3/IL6R/TAPBP/CHUK/CDK4/PRKCG/NFKB1/SLA-2/CREB3L2/ROCK1/YES1/MYC/GNG7/EIF4EBP1/GNG10/ADCY4/SRC/ITGAV/IFNB1/TRAF5/GN…	ssc:396668/ssc:100126861/ssc:494459/ssc:100522926/ssc:397157/ssc:100621541/ssc:100381266/ssc:100144302/ssc:100154407/ssc:100151828/ssc:397657/ssc:100627149/ssc:733588/ssc:595105/ssc:397422/ssc:100157291/ssc:100125828/ssc:100144516/ssc:396656/ssc:100525156/ssc:396633/ssc:397523/ssc:100135665/ssc:100625946/ssc:100152215/ssc:100516546/ssc:397241/ssc:100505408/ssc:397276/ssc:397652/ssc:100516546/ssc:…	89	55	396668/100126861/494459/100154056/100621541/100381266/100144302/110261113/397657/110255928/733588/397422/100157291/100144516/396656/100525156/396633/397523/100135665/110256149/100505408/397276/110261346/100514402/100135037/100513840/110260411/100625072/397543/396838/110259208/396603/100037288/100155428/100144492/751869/100135031/100627508/100152067/100154503/397285/445459/396613/396650/100525505/…	34	397157/100151828/595105/100125828/100152215/100524280/397241/100623628/397244/100101471/100170131/100522824/100621789/100233191/100156777/100157507/399522/100135662/100518074/100520468/397447/100627112/448810/100621275/100515992/396616/100620948/100153846/100126852/110256043/100627149/397454/100152679/100620340
ssc05167	Kaposi sarcoma-associated herpesvirus infection	79/2161	177/6302	0.00244429	0.059603	100511902/100126861/100154056/397157/100144486/110261113/100151828/397441/397657/110255928/396658/595105/100125828/396656/100518663/396633/397201/396609/100135665/414904/110256149/100152215/100524280/397363/397241/100525396/397276/110261346/100135037/397244/396913/100513840/100101471/110260411/100170131/100621789/100233191/397543/396838/100156777/110259208/100519508/396603/100037288/100135662/100…	RCAN1/AKT1/CALM1/VEGFA/FOS/E2F2/RB1/CD86/CTNNB1/RAC3/IFNAR1/CASP8/TBK1/IRF3/PLCG2/BAX/JAK2/MAPK9/RELA/CXCL2/MAP2K3/CDKN1A/GNB4/TYK2/PPP3CA/LOC100525396/TP53/GNB1/SLA-6/CASP3/JUN/TRAF2/IKBKB/MAPK15/CYCS/PIK3CA/MAP2K1/BAK1/CALM3/CASP7/HRAS/IKBKE/PPP3CB/SLA-3/CHUK/CDK4/NFKB1/SLA-2/YES1/MYC/GNG7/GNG10/HIF1A/MAP2K4/IRF9/SRC/IFNB1/GNG3/E2F1/BECN1/SLA-7/FOSB/MAP2K2/PIK3C3/STAT2/TNFRSF1A/NFKBIA/GSK3B/CLE…	ssc:100511902/ssc:100126861/ssc:100522926/ssc:397157/ssc:100144486/ssc:100154407/ssc:100151828/ssc:397441/ssc:397657/ssc:100627149/ssc:396658/ssc:595105/ssc:100125828/ssc:396656/ssc:100518663/ssc:396633/ssc:397201/ssc:396609/ssc:100135665/ssc:414904/ssc:100625946/ssc:100152215/ssc:100516546/ssc:397363/ssc:397241/ssc:100525396/ssc:397276/ssc:100516546/ssc:100135037/ssc:397244/ssc:396913/ssc:100513…	79	44	100126861/100154056/110261113/397657/110255928/396656/100518663/396633/100135665/414904/110256149/397363/100525396/397276/110261346/100135037/396913/100513840/110260411/397543/396838/110259208/100519508/396603/100037288/100144492/751869/100135031/100520100/780415/100154503/445459/396650/110261009/100525505/396923/397020/406188/100037293/110260605/733648/100516546/100623776/100739510	35	100511902/397157/100144486/100151828/397441/396658/595105/100125828/397201/396609/100152215/100524280/397241/397244/100101471/100170131/100621789/100233191/100156777/100135662/100627112/448810/100621275/100515992/396696/100620948/100153846/733576/503700/100126852/100520839/100125540/100627149/397454/100620340
ssc04064	NF-kappa B signaling pathway	43/2161	88/6302	0.00316527	0.0716709	396668/100533196/100520196/100621034/396985/100621090/100622285/396606/396723/396925/100153829/100038026/100622156/100518663/100153785/100127166/100135665/414904/100525396/100737256/100513840/100101471/414381/100517796/100622590/100135662/751869/100037938/100622609/397211/100513988/396616/100624570/397020/406188/100125540/100125555/733669/100620340/397086/100524751/100623776/100156182	CCL4/UBE2I/LTBR/PARP1/PLAU/GADD45B/TRIM25/IRAK1/DDX58/VCAM1/NFKB2/TNFSF13B/TNFAIP3/PLCG2/TAB1/IRAK4/RELA/CXCL2/LOC100525396/CSNK2A2/TRAF2/IKBKB/CFLAR/TAB3/BIRC3/CHUK/NFKB1/CD14/RELB/CSNK2B/ERC1/TRAF5/CYLD/TNFRSF1A/NFKBIA/SYK/LY96/GADD45A/TRADD/TNF/RIPK1/TICAM1/TAB2	ssc:396668/ssc:100533196/ssc:100520196/ssc:100621034/ssc:396985/ssc:100621090/ssc:100622285/ssc:396606/ssc:396723/ssc:396925/ssc:100153829/ssc:100038026/ssc:100622156/ssc:100518663/ssc:100153785/ssc:100127166/ssc:100135665/ssc:414904/ssc:100525396/ssc:100737256/ssc:100513840/ssc:100101471/ssc:414381/ssc:100517796/ssc:100622590/ssc:100135662/ssc:751869/ssc:100037938/ssc:100622609/ssc:397211/ssc:10…	43	25	396668/100533196/100520196/100621034/100621090/396606/396925/100153829/100622156/100518663/100153785/100135665/414904/100525396/100737256/100513840/751869/100622609/397211/397020/406188/733669/397086/100524751/100623776	18	396985/100622285/396723/100038026/100127166/100101471/414381/100517796/100622590/100135662/100037938/100513988/396616/100624570/100125540/100125555/100620340/100156182
ssc05219	Bladder cancer	22/2161	39/6302	0.00369846	0.0781608	397564/397157/110261113/100151828/100624415/100152215/397276/110260411/100233191/100516830/100048953/110259208/100144492/100155578/100627112/448810/492313/100516103/100154503/100153846/100516641/100525505	HBEGF/VEGFA/E2F2/RB1/DAPK3/CDKN1A/TP53/MAPK15/MAP2K1/RASSF1/CDH1/HRAS/CDK4/DAPK2/YES1/MYC/THBS1/DAPK1/SRC/E2F1/ERBB2/MAP2K2	ssc:397564/ssc:397157/ssc:100154407/ssc:100151828/ssc:100624415/ssc:100152215/ssc:397276/ssc:100153927/ssc:100233191/ssc:100516830/ssc:100048953/ssc:100739349/ssc:100144492/ssc:100155578/ssc:100154503/ssc:448810/ssc:492313/ssc:100516103/ssc:100154503/ssc:100153846/ssc:100516641/ssc:100525505	22	11	110261113/100624415/397276/110260411/110259208/100144492/492313/100516103/100154503/100516641/100525505	11	397564/397157/100151828/100152215/100233191/100516830/100048953/100155578/100627112/448810/100153846
ssc04145	Phagosome	61/2161	134/6302	0.00424464	0.084097	733594/100623583/733686/100516352/100736584/100127131/100153403/397684/100523018/100153387/100135040/100381266/110255649/100155091/100037921/110255928/100154942/397062/110258382/100624785/445464/100135037/445531/100144499/100135050/100135051/100624195/100156112/397018/100037288/100625381/445528/100153507/397472/100155306/100154566/100037938/100135031/397483/492313/100621483/397653/100157002/39662…	TUBA1B/TUBB6/TUBB/TUBB4B/TUBB4A/LOC100127131/EEA1/FCGR3A/ATP6V0A1/SLA-DQA1/SLA-DRA/CALR/LOC110255649/ITGA5/SLA-DQB1/RAC3/ATP6V1C1/TFRC/LOC110258382/LOC100624785/C1R/SLA-6/ATP6V1A/RAB5A/SLA-DMB/TUBA1A/DYNC2H1/ATP6V1E1/SCARB1/SLA-3/RAB5B/SLA-DMA/TUBB2B/ATP6V1H/SEC61A1/DYNC1I2/CD14/SLA-2/ITGA2/THBS1/CORO1A/ACTG1/LOC100157002/TLR6/ITGAV/ATP6V1D/ATP6V1B1/ITGAX/TLR2/CTSS/SLA-7/PIKFYVE/ATP6V0D1/PIK3C3/N…	ssc:733594/ssc:100623583/ssc:733686/ssc:100516352/ssc:100736584/ssc:100127131/ssc:100153403/ssc:397684/ssc:100523018/ssc:100153387/ssc:100135040/ssc:100381266/ssc:100153403/ssc:100155091/ssc:100037921/ssc:100627149/ssc:100154942/ssc:397062/ssc:100153403/ssc:100153507/ssc:445464/ssc:100135037/ssc:445531/ssc:100144499/ssc:100135050/ssc:100135051/ssc:100624195/ssc:100156112/ssc:397018/ssc:100037288/…	61	31	733594/100623583/733686/100516352/100127131/397684/100153387/100135040/100381266/100037921/110255928/100624785/445464/100135037/100135050/100135051/100037288/445528/100153507/100154566/100135031/492313/100621483/397285/100738907/396623/396650/100518811/100037293/100626901/100523862	30	100736584/100153403/100523018/110255649/100155091/100154942/397062/110258382/445531/100144499/100624195/100156112/397018/100625381/397472/100155306/100037938/397483/397653/100157002/396621/100156681/100523368/100153090/100521692/100525048/503700/100142665/100154525/100627149
ssc04218	Cellular senescence	71/2161	160/6302	0.00469606	0.0864303	396945/100126861/397094/100154056/100157175/733612/397651/100518718/100415929/100621090/100511565/110261113/100513591/100151828/397378/100153296/100135665/110256149/100152215/100135668/397077/397241/100505408/100153233/100512330/397276/397393/100135037/100158185/100624279/733611/110260411/100621789/100233191/100157000/780426/396838/397027/110259208/396603/110260696/100037288/397662/100523248/1001…	SERPINE1/AKT1/IL1A/CALM1/MYBL2/PPP1CC/VDAC3/SQSTM1/CCNA2/GADD45B/FOXM1/E2F2/ZFP36L2/RB1/PPP1CB/RBL1/RELA/MAP2K3/CDKN1A/CCNB2/FOXO1/PPP3CA/TSC2/NBN/RAD9A/TP53/CAPN2/SLA-6/SLC25A5/ZFP36L1/PPP1CA/MAPK15/PIK3CA/MAP2K1/TRAF3IP2/CCND3/CALM3/CAPN1/HRAS/PPP3CB/RASSF3/SLA-3/CCNB1/CCNE1/PTEN/CDK4/NFKB1/HUS1/SLA-2/TRPV4/MYC/SMAD3/EIF4EBP1/VDAC2/RRAS/E2F1/LIN37/RAD1/SLA-7/MAP2K2/RBL2/TRPM7/TGFBR2/FBXW11/SLA-…	ssc:396945/ssc:100126861/ssc:397094/ssc:100522926/ssc:100157175/ssc:733612/ssc:397651/ssc:100518718/ssc:100415929/ssc:100621090/ssc:100511565/ssc:100154407/ssc:100513591/ssc:100151828/ssc:397378/ssc:100153296/ssc:100135665/ssc:100625946/ssc:100152215/ssc:100135668/ssc:397077/ssc:397241/ssc:100505408/ssc:100153233/ssc:100512330/ssc:397276/ssc:397393/ssc:100135037/ssc:100158185/ssc:100624279/ssc:73…	71	48	100126861/100154056/100157175/733612/100518718/100415929/100621090/100511565/110261113/100153296/100135665/110256149/100135668/397077/100505408/100512330/397276/397393/100135037/100158185/733611/110260411/780426/396838/397027/110259208/396603/100037288/397662/100156264/100144492/751869/100135031/100126845/397260/100627508/397659/100516558/100628065/100513318/396650/100525505/100627715/100038019/1…	23	396945/397094/397651/100513591/100151828/397378/100152215/397241/100153233/100624279/100621789/100233191/100157000/110260696/100523248/100192318/448810/100153846/100169932/100523218/397454/100516687/751859
ssc03030	DNA replication	19/2161	33/6302	0.005052	0.0864303	100624915/100520434/100517450/100517749/110259871/100525752/100154824/100625239/100620959/100519111/100620242/100157576/100513971/100626539/100626052/100517646/100736957/100523170/100514809	MCM5/LIG1/POLE3/FEN1/MCM7/POLD1/MCM3/RNASEH2B/POLE/MCM2/RFC2/PRIM1/POLA2/RNASEH1/POLD3/POLE4/POLD4/RNASEH2A/POLD2	ssc:100624915/ssc:100520434/ssc:100517450/ssc:100517749/ssc:100156398/ssc:100525752/ssc:100154824/ssc:100625239/ssc:100620959/ssc:100519111/ssc:100620242/ssc:100157576/ssc:100513971/ssc:100626539/ssc:100626052/ssc:100517646/ssc:100736957/ssc:100523170/ssc:100514809	19	18	100624915/100520434/100517450/100517749/110259871/100525752/100154824/100625239/100620959/100519111/100620242/100157576/100513971/100626539/100626052/100517646/100523170/100514809	1	100736957
ssc04144	Endocytosis	100/2161	236/6302	0.00518036	0.0864303	396648/100512857/100153403/100520151/100738636/100627841/110259389/100620812/110255649/100738234/100192441/100513395/404693/100512536/100625238/100628127/100626761/396906/414900/100153561/100623956/100127133/397214/100511697/100156344/100513035/100627676/100511890/595108/100523947/780425/100737127/100626125/397062/100516767/110258382/100174964/106508767/100622538/100152415/100514115/100622196/780…	HSP70.2/CHMP6/EEA1/GIT1/EPN1/VPS4A/GRK6/AGAP1/LOC110255649/EHD4/VPS26B/ARFGAP2/CAV1/WASHC1/AGAP3/CHMP1A/AP2M1/HSPA6/PLD2/SNX1/PSD3/FGFR4/IGF2R/CBLC/SH3GLB2/CHMP5/SMURF2/HSPA8/ARF4/SH3GL1/ARF6/RAB31/ASAP3/TFRC/CHMP4B/LOC110258382/ARPC1B/HGS/DNM2/SPG20/FGFR3/IQSEC1/CDC42/BIN1/EHD2/SLA-6/SNX6/RAB5A/MVB12B/GRK5/VPS26A/AP2A2/WIPF2/STAM/MVB12A/IGF1R/SLA-3/STAMBP/RAB5B/WWP1/SNX12/SLA-2/PRKCZ/IQSEC2/YES1…	ssc:396648/ssc:100512857/ssc:100153403/ssc:100520151/ssc:100737860/ssc:100627841/ssc:100152937/ssc:100620812/ssc:100153403/ssc:100516416/ssc:100192441/ssc:100513395/ssc:404693/ssc:100512536/ssc:100625238/ssc:100628127/ssc:100626761/ssc:396906/ssc:414900/ssc:100153561/ssc:100623956/ssc:100127133/ssc:397214/ssc:100511697/ssc:100156344/ssc:100513035/ssc:100621443/ssc:100511890/ssc:595108/ssc:1005239…	100	59	100512857/100520151/100738636/100627841/110259389/100620812/100192441/100513395/100512536/100625238/100628127/100626761/396906/414900/100153561/100127133/397214/100511697/100156344/100523947/780425/100737127/100516767/100174964/106508767/100622538/100514115/100622196/780428/100037305/100624668/100135037/102159800/100513262/100523271/397350/100037288/100155023/100135031/100533200/396755/100622124/…	41	396648/100153403/110255649/100738234/404693/100623956/100513035/100627676/100511890/595108/100626125/397062/110258382/100152415/100154775/100144499/100152937/100155086/100525252/110259321/100516729/100625381/100157283/100520058/100627112/100523757/100627914/100519746/406190/100520136/100624272/100623575/100513326/100271929/100622420/100623785/100516044/100514766/100152185/100511491/100154382
ssc04623	Cytosolic DNA-sensing pathway	28/2161	54/6302	0.00572981	0.0908175	396668/494019/100621111/100523894/396723/100125828/396656/100155669/100135665/100623333/102159905/100101471/100519508/100516367/414414/100156229/100135662/751869/100737214/100153263/100157033/445459/396613/100519356/100738796/406188/100154035/100524751	CCL4/CXCL10/NFKBIB/POLR3E/DDX58/TBK1/IRF3/TREX1/RELA/POLR2E/POLR3B/IKBKB/IKBKE/POLR3C/POLR1C/POLR3A/CHUK/NFKB1/POLR2F/RIPK3/POLR3H/IFNB1/CCL5/POLR3G/POLR3F/NFKBIA/POLR3D/RIPK1	ssc:396668/ssc:494019/ssc:100621111/ssc:100523894/ssc:396723/ssc:100125828/ssc:396656/ssc:100155669/ssc:100135665/ssc:100623333/ssc:102159905/ssc:100101471/ssc:100519508/ssc:100516367/ssc:414414/ssc:100156229/ssc:100135662/ssc:751869/ssc:100737214/ssc:100153263/ssc:100157033/ssc:445459/ssc:396613/ssc:100519356/ssc:100738796/ssc:406188/ssc:100154035/ssc:100524751	28	22	396668/494019/100621111/100523894/396656/100155669/100135665/100623333/100519508/100516367/414414/100156229/751869/100737214/100153263/100157033/445459/396613/100738796/406188/100154035/100524751	6	396723/100125828/102159905/100101471/100135662/100519356
