# Supplementary material for: Foot-and-mouth disease virus VP1 promotes viral replication by regulating the expression of chemokines and GBP1
Source: Front Vet Sci. 2022 Jul 22;9:937409. doi: 10.3389/fvets.2022.937409 (PMC9353127; doi:10.3389/fvets.2022.937409)
Supplement: Supplementary file 3 [file Table_3.XLSX]

## Sheet: 1
Table S3: KEGG significant enrichment of up-regulated DEGs
KEGGID	Class A Anotation	Class B Anotation	Description	GeneRatio	BgRatio	pvalue	padj	geneID	geneName	keggID	Count
ssc03040	genetic information processing	transcription	Spliceosome	61/1168	135/6302	6.29e-13	1.94e-10	100153480/100157814/100739153/768103/100144769/100514153/100620496/100158042/100511390/100522004/100156353/100516520/768117/396906/768109/768102/100101926/100512288/100524872/100628160/100522208/100524846/100624623/100626496/100738028/100516539/100156173/100156573/100624565/100190995/110256499/100154637/100154006/100154606/100518189/100511501/100525328/100739296/100522884/100515470/100622501/1005…	SNRPD3/SF3B4/SRSF3/HNRNPA1/PRPF19/HNRNPM/ALYREF/RBMX/RBM25/SF3B2/ACIN1/HNRNPA3/SRSF2/HSPA6/SNRPA/SRSF6/EIF4A3/SF3A3/SNRPD1/SNRNP70/EFTUD2/SART1/PRPF6/HNRNPC/CHERP/SF3A2/RBM8A/SNRPA1/PUF60/PRPF3/U2AF1/SRSF9/BCAS2/SNRPC/SRSF7/PCBP1/XAB2/LSM8/LSM6/LSM7/PRPF4/SNRPG/SNRNP40/TRA2B/DHX38/DHX33/U2AF2/SF3A1/PRPF31/RBM22/HNRNPK/LSM3/RBM17/PPIL1/SNRPF/WBP11/SF3B5/LSM5/CTNNBL1/TXNL4A/THOC1	ssc:100153480/ssc:100157814/ssc:100739153/ssc:768103/ssc:100144769/ssc:100514153/ssc:100620496/ssc:100158042/ssc:100511390/ssc:100522004/ssc:100156353/ssc:100516520/ssc:768117/ssc:396906/ssc:768109/ssc:768102/ssc:100101926/ssc:100512288/ssc:100524872/ssc:100628160/ssc:100522208/ssc:100524846/ssc:100624623/ssc:100626496/ssc:100738028/ssc:100516539/ssc:100156173/ssc:100156573/ssc:100624565/ssc:1001…	61
ssc05166	infectious disease	virus infection	Human T-cell leukemia virus 1 infection	68/1168	215/6302	1.83e-06	0.000281489	100524215/100126861/100151896/102164975/100515210/100153387/100520196/100135040/100381266/100415929/100144302/397379/110261113/100621019/100153121/100524070/100037921/102157652/100153829/100144516/397550/396633/100135665/100135668/100621206/100514391/397276/100514402/397655/100135037/100155743/100519835/100158185/396913/100135050/110260411/780426/110259208/100513600/100152087/396603/100037288/445…	KAT2A/AKT1/RANBP1/BUB1B/CDKN2C/SLA-DQA1/LTBR/SLA-DRA/CALR/CCNA2/ATF4/CDC20/E2F2/ANAPC2/ESPL1/TCF3/SLA-DQB1/MAD1L1/NFKB2/ATF6B/STAT5A/BAX/RELA/CCNB2/CRTC3/RANBP3/TP53/ADCY3/RAN/SLA-6/ANAPC7/CRTC2/SLC25A5/JUN/SLA-DMB/MAPK15/CCND3/HRAS/VAC14/ANAPC5/PPP3CB/SLA-3/SLA-DMA/PTEN/GPS2/CDK4/NFKB1/MAD2L1/SLA-2/RELB/SMAD3/ADCY4/CRTC1/VDAC2/MAP2K4/MAP3K3/SLA-7/FOSB/MAP2K2/TNFRSF1A/NFKBIA/TGFBR2/TERT/SLA-1/TNF…	ssc:100524215/ssc:100126861/ssc:100151896/ssc:102164975/ssc:100515210/ssc:100153387/ssc:100520196/ssc:100135040/ssc:100381266/ssc:100415929/ssc:100144302/ssc:397379/ssc:100154407/ssc:100621019/ssc:100153121/ssc:100524070/ssc:100037921/ssc:102157652/ssc:100153829/ssc:100144516/ssc:397550/ssc:396633/ssc:100135665/ssc:100135668/ssc:100621206/ssc:100514391/ssc:397276/ssc:100514402/ssc:397655/ssc:1001…	68
ssc03030	genetic information processing	replication and repair	DNA replication	18/1168	33/6302	3.6e-06	0.000370091	100624915/100520434/100517450/100517749/110259871/100525752/100154824/100625239/100620959/100519111/100620242/100157576/100513971/100626539/100626052/100517646/100523170/100514809	MCM5/LIG1/POLE3/FEN1/MCM7/POLD1/MCM3/RNASEH2B/POLE/MCM2/RFC2/PRIM1/POLA2/RNASEH1/POLD3/POLE4/RNASEH2A/POLD2	ssc:100624915/ssc:100520434/ssc:100517450/ssc:100517749/ssc:100156398/ssc:100525752/ssc:100154824/ssc:100625239/ssc:100620959/ssc:100519111/ssc:100620242/ssc:100157576/ssc:100513971/ssc:100626539/ssc:100626052/ssc:100517646/ssc:100523170/ssc:100514809	18
ssc05169	infectious disease	virus infection	Epstein-Barr virus infection	59/1168	193/6302	2.79e-05	0.00174183	100512253/494019/100126861/100153387/100627568/100135040/100524330/100621111/100381266/100415929/100621090/110261113/733583/396606/100037921/100190899/110255928/100153829/100622156/396656/100518663/100153785/396633/100135665/110256149/397363/397276/100135037/396913/733643/100513840/100135050/100512454/780426/397543/100519508/100517815/100037288/445528/100155428/100144492/751869/100135031/10062260…	PSMD3/CXCL10/AKT1/SLA-DQA1/PSMD2/SLA-DRA/SEM1/NFKBIB/CALR/CCNA2/GADD45B/E2F2/PSMD4/IRAK1/SLA-DQB1/USP7/RAC3/NFKB2/TNFAIP3/IRF3/PLCG2/TAB1/BAX/RELA/MAP2K3/TYK2/TP53/SLA-6/JUN/NCOR2/TRAF2/SLA-DMB/PSMC3/CCND3/BAK1/IKBKE/PSMD13/SLA-3/SLA-DMA/TAPBP/CDK4/NFKB1/SLA-2/RELB/MAP2K4/IRF9/IFNB1/PSMC1/TLR2/SLA-7/STAT2/NFKBIA/SLA-1/MAPK11/GADD45A/TNF/STAT3/RIPK1/PIK3R2	ssc:100512253/ssc:494019/ssc:100126861/ssc:100153387/ssc:100627568/ssc:100135040/ssc:100155621/ssc:100621111/ssc:100381266/ssc:100415929/ssc:100621090/ssc:100154407/ssc:733583/ssc:396606/ssc:100037921/ssc:100190899/ssc:100627149/ssc:100153829/ssc:100622156/ssc:396656/ssc:100518663/ssc:100153785/ssc:396633/ssc:100135665/ssc:100625946/ssc:397363/ssc:397276/ssc:100135037/ssc:396913/ssc:733643/ssc:10…	59
ssc03013	genetic information processing	transcription	RNA transport	51/1168	160/6302	2.83e-05	0.00174183	100153811/100525426/100294711/100626040/100621612/100513802/100517070/100101928/100624225/100515840/100533196/100620496/100737559/100512219/100156353/100526070/100518833/100523151/100101926/100524591/100152786/100622917/100156173/100101924/414417/397044/100738783/397655/100515926/100154567/100153500/100511016/100522827/100515013/100520826/100526149/100623258/100524839/100155084/100519334/10010192…	RANGAP1/CASC3/PRMT5/NUP93/NDC1/TACC3/EIF3J/EIF4A2/SUMO3/PABPC4/UBE2I/ALYREF/RNPS1/POM121C/ACIN1/NUP85/GEMIN6/NUP205/EIF4A3/PAIP1/DDX20/EIF2B3/RBM8A/EIF4E2/EIF1B/SUMO2/UPF1/RAN/NUP210/NUP43/NUP188/XPOT/GEMIN4/PHAX/EIF4G2/PNN/SAP18/ELAC1/XPO5/THOC7/EIF4A1/EIF3D/EIF4EBP1/KPNB1/SMN1/GEMIN5/THOC1/SNUPN/RPP25L/EIF2B5/RPP21	ssc:100153811/ssc:100525426/ssc:100294711/ssc:100626040/ssc:100621612/ssc:100513802/ssc:100517070/ssc:100101928/ssc:100624225/ssc:100515840/ssc:100533196/ssc:100620496/ssc:100737559/ssc:100512219/ssc:100156353/ssc:100526070/ssc:100518833/ssc:100523151/ssc:100101926/ssc:100524591/ssc:100152786/ssc:100622917/ssc:100156173/ssc:100101924/ssc:414417/ssc:397044/ssc:100738783/ssc:397655/ssc:100515926/ss…	51
ssc04612	infectious disease	immune system	Antigen processing and presentation	21/1168	49/6302	6.89e-05	0.00353689	100153387/100135040/100381266/396742/396906/396660/100037921/100174943/100135037/100135050/397572/100525647/100037288/445528/100155428/100135031/397522/396650/100037293/397086/100157587	SLA-DQA1/SLA-DRA/CALR/HSP90AB1/HSPA6/CD74/SLA-DQB1/IFI30/SLA-6/SLA-DMB/PSME1/NFYC/SLA-3/SLA-DMA/TAPBP/SLA-2/PSME2/SLA-7/SLA-1/TNF/NFYB	ssc:100153387/ssc:100135040/ssc:100381266/ssc:396742/ssc:396906/ssc:396660/ssc:100037921/ssc:100174943/ssc:100135037/ssc:100135050/ssc:397572/ssc:100525647/ssc:100037288/ssc:445528/ssc:100155428/ssc:100135031/ssc:397522/ssc:396650/ssc:100037293/ssc:397086/ssc:100157587	21
ssc03020	genetic information processing	transcription	RNA polymerase	16/1168	33/6302	8.48e-05	0.00372953	100517151/100737040/100523894/100623333/414403/100516367/414414/100156229/100737214/397001/100157033/100738796/100518066/100154035/100521614/100737579	POLR1B/POLR2A/POLR3E/POLR2E/POLR2I/POLR3C/POLR1C/POLR3A/POLR2F/POLR2B/POLR3H/POLR3F/POLR1A/POLR3D/POLR2J/POLR2D	ssc:100517151/ssc:100737040/ssc:100523894/ssc:100623333/ssc:414403/ssc:100516367/ssc:414414/ssc:100156229/ssc:100737214/ssc:397001/ssc:100157033/ssc:100738796/ssc:100518066/ssc:100154035/ssc:100521614/ssc:100737579	16
ssc04623	infectious disease	immune system	Cytosolic DNA-sensing pathway	22/1168	54/6302	0.000116471	0.00448413	396668/494019/100621111/100523894/396656/100155669/100135665/100623333/100519508/100516367/414414/100156229/751869/100737214/100153263/100157033/445459/396613/100738796/406188/100154035/100524751	CCL4/CXCL10/NFKBIB/POLR3E/IRF3/TREX1/RELA/POLR2E/IKBKE/POLR3C/POLR1C/POLR3A/NFKB1/POLR2F/RIPK3/POLR3H/IFNB1/CCL5/POLR3F/NFKBIA/POLR3D/RIPK1	ssc:396668/ssc:494019/ssc:100621111/ssc:100523894/ssc:396656/ssc:100155669/ssc:100135665/ssc:100623333/ssc:100519508/ssc:100516367/ssc:414414/ssc:100156229/ssc:751869/ssc:100737214/ssc:100153263/ssc:100157033/ssc:445459/ssc:396613/ssc:100738796/ssc:406188/ssc:100154035/ssc:100524751	22
ssc04218	cell processing	cell growth and daeth	Cellular senescence	48/1168	160/6302	0.000252642	0.00864599	100126861/100154056/100157175/733612/100518718/100415929/100621090/100511565/110261113/100153296/100135665/110256149/100135668/397077/100505408/100512330/397276/397393/100135037/100158185/733611/110260411/780426/396838/397027/110259208/396603/100037288/397662/100156264/100144492/751869/100135031/100126845/397260/100627508/397659/100516558/100628065/100513318/396650/100525505/100627715/100038019/1…	AKT1/CALM1/MYBL2/PPP1CC/SQSTM1/CCNA2/GADD45B/FOXM1/E2F2/RBL1/RELA/MAP2K3/CCNB2/FOXO1/TSC2/RAD9A/TP53/CAPN2/SLA-6/SLC25A5/PPP1CA/MAPK15/CCND3/CALM3/CAPN1/HRAS/PPP3CB/SLA-3/CCNB1/PTEN/CDK4/NFKB1/SLA-2/TRPV4/SMAD3/EIF4EBP1/VDAC2/RRAS/LIN37/RAD1/SLA-7/MAP2K2/RBL2/TGFBR2/SLA-1/MAPK11/GADD45A/PIK3R2	ssc:100126861/ssc:100522926/ssc:100157175/ssc:733612/ssc:100518718/ssc:100415929/ssc:100621090/ssc:100511565/ssc:100154407/ssc:100153296/ssc:100135665/ssc:100625946/ssc:100135668/ssc:397077/ssc:100505408/ssc:100512330/ssc:397276/ssc:397393/ssc:100135037/ssc:100158185/ssc:733611/ssc:100153927/ssc:780426/ssc:100522926/ssc:397027/ssc:100739349/ssc:396603/ssc:100037288/ssc:397662/ssc:100156264/ssc:10…	48
ssc04668	environmental information processing	signal transduction	TNF signaling pathway	34/1168	103/6302	0.000286634	0.00882832	494019/100126861/100626270/106508765/100144302/396611/100628179/396925/397422/100144516/100622156/100153785/100135665/414904/110256149/100156773/100525396/396913/100513840/110260411/553951/751869/100153263/100520100/445459/396613/110261009/397020/406188/110260605/493186/397086/100524751/100739510	CXCL10/AKT1/RPS6KA4/PGAM5/ATF4/IRF1/DAB2IP/VCAM1/CCL2/ATF6B/TNFAIP3/TAB1/RELA/CXCL2/MAP2K3/JAG1/LOC100525396/JUN/TRAF2/MAPK15/CCL20/NFKB1/RIPK3/MAP2K4/IFNB1/CCL5/FOSB/TNFRSF1A/NFKBIA/MAPK11/SOCS3/TNF/RIPK1/PIK3R2	ssc:494019/ssc:100126861/ssc:100626270/ssc:106508765/ssc:100144302/ssc:396611/ssc:100628179/ssc:396925/ssc:397422/ssc:100144516/ssc:100622156/ssc:100153785/ssc:100135665/ssc:414904/ssc:100625946/ssc:100156773/ssc:100525396/ssc:396913/ssc:100513840/ssc:100153927/ssc:553951/ssc:751869/ssc:100153263/ssc:100520100/ssc:445459/ssc:396613/ssc:100144486/ssc:397020/ssc:406188/ssc:100156630/ssc:493186/ssc:…	34
ssc04110	cell processing	cell growth and daeth	Cell cycle	39/1168	126/6302	0.000472193	0.0132214	396953/100624915/102164975/733625/100515210/100415929/100621090/110259871/100524544/397379/110261113/100621019/100154824/100153121/100048964/100151862/497234/102157652/100153296/100519111/100524037/100135668/397276/100155743/100519878/780426/100152087/100286809/397662/100155504/100144492/100523455/100736650/397260/100621036/100627715/100738633/733669/100415776	PLK1/MCM5/BUB1B/SFN/CDKN2C/CCNA2/GADD45B/MCM7/ABL1/CDC20/E2F2/ANAPC2/MCM3/ESPL1/YWHAQ/CDC45/FZR1/MAD1L1/RBL1/MCM2/CUL1/CCNB2/TP53/ANAPC7/ORC3/CCND3/ANAPC5/PKMYT1/CCNB1/YWHAH/CDK4/MAD2L1/MAD2L2/SMAD3/TFDP1/RBL2/RAD21/GADD45A/ANAPC13	ssc:396953/ssc:100624915/ssc:102164975/ssc:733625/ssc:100515210/ssc:100415929/ssc:100621090/ssc:100156398/ssc:100524544/ssc:397379/ssc:100154407/ssc:100621019/ssc:100154824/ssc:100153121/ssc:100048964/ssc:100151862/ssc:497234/ssc:102157652/ssc:100153296/ssc:100519111/ssc:100524037/ssc:100135668/ssc:397276/ssc:100155743/ssc:100519878/ssc:780426/ssc:100152087/ssc:100286809/ssc:397662/ssc:100155504/…	39
ssc05132	infectious disease	virus infection	Salmonella infection	57/1168	206/6302	0.000705168	0.0180993	100157773/100126861/100522681/100515528/100512494/100523621/396742/100515607/100515138/396606/100521540/397657/396904/110255928/100153785/780425/396633/100155782/100135665/110256149/100174964/780428/100512860/100144503/100151740/396913/100513840/110260411/397543/733585/100627455/102167025/100518876/100154566/751869/110261556/414399/100153263/100520100/100516558/100154462/100270721/396623/11026100…	DYNLL1/AKT1/PLEKHM2/PKN1/PFN1/KLC1/HSP90AB1/GSDMD/S100A10/IRAK1/KLC2/CTNNB1/MYH9/RAC3/TAB1/ARF6/BAX/WASF3/RELA/MAP2K3/ARPC1B/CDC42/DYNLL2/RHOB/FYCO1/JUN/TRAF2/MAPK15/BAK1/FLNA/SNX9/PGAP2/SNX18/DYNC1I2/NFKB1/VPS33B/MRLC2/RIPK3/MAP2K4/RRAS/ARPC5L/ARF2/TLR2/FOSB/MAP2K2/TNFRSF1A/NFKBIA/FLNB/PFN2/DYNC1LI2/TXN2/ARPC1A/MAPK11/TNF/RIPK1/RAB5C/ARF1	ssc:100157773/ssc:100126861/ssc:100522681/ssc:100515528/ssc:100512494/ssc:100523621/ssc:396742/ssc:100515607/ssc:100515138/ssc:396606/ssc:100521540/ssc:397657/ssc:396904/ssc:100627149/ssc:100153785/ssc:780425/ssc:396633/ssc:100155782/ssc:100135665/ssc:100625946/ssc:100174964/ssc:780428/ssc:100512860/ssc:100144503/ssc:100151740/ssc:396913/ssc:100513840/ssc:100153927/ssc:397543/ssc:100518997/ssc:10…	57
ssc03410	genetic information processing	replication and repair	Base excision repair	14/1168	32/6302	0.000872712	0.0206766	100520434/445521/100621034/100517450/100517749/100525752/100620959/100519604/100620838/100513867/100154728/100626052/100517646/100514809	LIG1/HMGB1/PARP1/POLE3/FEN1/POLD1/POLE/XRCC1/PARP3/MUTYH/APEX1/POLD3/POLE4/POLD2	ssc:100520434/ssc:445521/ssc:100621034/ssc:100517450/ssc:100517749/ssc:100525752/ssc:100620959/ssc:100519604/ssc:100620838/ssc:100513867/ssc:100154728/ssc:100626052/ssc:100517646/ssc:100514809	14
ssc05332	infectious disease	immune system dieases	Graft-versus-host disease	11/1168	23/6302	0.00128195	0.0269092	100153387/100135040/100037921/100135037/100135050/100037288/445528/100135031/396650/100037293/397086	SLA-DQA1/SLA-DRA/SLA-DQB1/SLA-6/SLA-DMB/SLA-3/SLA-DMA/SLA-2/SLA-7/SLA-1/TNF	ssc:100153387/ssc:100135040/ssc:100037921/ssc:100135037/ssc:100135050/ssc:100037288/ssc:445528/ssc:100135031/ssc:396650/ssc:100037293/ssc:397086	11
ssc05163	infectious disease	virus infection	Human cytomegalovirus infection	55/1168	202/6302	0.00131051	0.0269092	396668/100126861/494459/100154056/100621541/100381266/100144302/110261113/397657/110255928/733588/397422/100157291/100144516/396656/100525156/396633/397523/100135665/110256149/100505408/397276/110261346/100514402/100135037/100513840/110260411/100625072/397543/396838/110259208/396603/100037288/100155428/100144492/751869/100135031/100627508/100152067/100154503/397285/445459/396613/396650/100525505/…	CCL4/AKT1/CCL3L1/CALM1/BCAR1/CALR/ATF4/E2F2/CTNNB1/RAC3/GNA11/CCL2/ARHGEF11/ATF6B/IRF3/GNA12/BAX/GNAI2/RELA/MAP2K3/TSC2/TP53/GNB1/ADCY3/SLA-6/TRAF2/MAPK15/PTGER4/BAK1/CALM3/HRAS/PPP3CB/SLA-3/TAPBP/CDK4/NFKB1/SLA-2/EIF4EBP1/ADCY4/SRC/ITGAV/IFNB1/CCL5/SLA-7/MAP2K2/TNFRSF1A/NFKBIA/SLA-1/MAPK11/TNF/STAT3/RIPK1/GNB2/ADCY9/PIK3R2	ssc:396668/ssc:100126861/ssc:494459/ssc:100522926/ssc:100621541/ssc:100381266/ssc:100144302/ssc:100154407/ssc:397657/ssc:100627149/ssc:733588/ssc:397422/ssc:100157291/ssc:100144516/ssc:396656/ssc:100525156/ssc:396633/ssc:397523/ssc:100135665/ssc:100625946/ssc:100505408/ssc:397276/ssc:100516546/ssc:100514402/ssc:100135037/ssc:100513840/ssc:100153927/ssc:100625072/ssc:397543/ssc:100522926/ssc:10073…	55
ssc05168	infectious disease	virus infection	Herpes simplex virus 1 infection	78/1168	308/6302	0.00150011	0.028877	100126861/100620993/100739153/733612/100153387/100135040/100620496/110256670/100626782/100381266/100520469/100520285/768117/100126864/396606/396660/100520117/768102/100515432/100620532/100037921/100302088/397422/396656/100153785/396633/100622917/100135665/397363/100505408/397276/100135037/100513840/100135050/100154637/733611/100624957/100518189/397543/100519508/102160361/100037288/100156915/10052…	AKT1/ZNF768/SRSF3/PPP1CC/SLA-DQA1/SLA-DRA/ALYREF/ZNF140/ZNF205/CALR/ZNF746/ZNF777/SRSF2/IFNGR2/IRAK1/CD74/ZNF282/SRSF6/ZNF169/ZNF764/SLA-DQB1/BST2/CCL2/IRF3/TAB1/BAX/EIF2B3/RELA/TYK2/TSC2/TP53/SLA-6/TRAF2/SLA-DMB/SRSF9/PPP1CA/ZNF786/SRSF7/BAK1/IKBKE/ZNF354A/SLA-3/ZNF7/LOC100522942/SLA-DMA/ZNF689/TAPBP/ZNF212/NFKB1/SLA-2/ZNF688/LOC100513362/ZNF566/EIF4EBP1/IRF9/SRC/ZNF283/IFNB1/CCL5/ZNF643/TLR2/SL…	ssc:100126861/ssc:100620993/ssc:100739153/ssc:733612/ssc:100153387/ssc:100135040/ssc:100620496/ssc:100525345/ssc:100626782/ssc:100381266/ssc:100520469/ssc:100520285/ssc:768117/ssc:100126864/ssc:396606/ssc:396660/ssc:100520117/ssc:768102/ssc:100515432/ssc:100620532/ssc:100037921/ssc:100302088/ssc:397422/ssc:396656/ssc:100153785/ssc:396633/ssc:100622917/ssc:100135665/ssc:397363/ssc:100505408/ssc:39…	78
ssc04114	cell processing	cell growth and daeth	Oocyte meiosis	34/1168	113/6302	0.00182762	0.031662	396953/100154056/733612/397379/100516242/100621019/100153121/100048964/102157652/397088/100524037/100135668/100134967/397394/100514402/100155743/733611/110260411/100523972/110260085/396838/100152087/397350/396603/100286809/397662/100155504/100523455/396755/100736650/100152067/110260605/100625423/100415776	PLK1/CALM1/PPP1CC/CDC20/PPP2R5B/ANAPC2/ESPL1/YWHAQ/MAD1L1/PPP2R1A/CUL1/CCNB2/PPP2R5D/CAMK2G/ADCY3/ANAPC7/PPP1CA/MAPK15/RPS6KA1/PPP4C/CALM3/ANAPC5/IGF1R/PPP3CB/PKMYT1/CCNB1/YWHAH/MAD2L1/INSR/MAD2L2/ADCY4/MAPK11/ADCY9/ANAPC13	ssc:396953/ssc:100522926/ssc:733612/ssc:397379/ssc:100516242/ssc:100621019/ssc:100153121/ssc:100048964/ssc:102157652/ssc:397088/ssc:100524037/ssc:100135668/ssc:100134967/ssc:397394/ssc:100514402/ssc:100155743/ssc:733611/ssc:100153927/ssc:100523972/ssc:397656/ssc:100522926/ssc:100152087/ssc:397350/ssc:396603/ssc:100286809/ssc:397662/ssc:100155504/ssc:100523455/ssc:397350/ssc:100736650/ssc:10015206…	34
ssc04211	cell processing	cell growth and daeth	Longevity regulating pathway	26/1168	80/6302	0.00185038	0.031662	100126861/100144302/110258080/100144516/396633/100135665/100512213/100124382/397077/100101924/100505408/397276/100514402/110259208/397350/751869/396755/100627508/100152067/110255858/106509647/100620966/100157793/100154319/100625423/100739510	AKT1/ATF4/EHMT1/ATF6B/BAX/RELA/STK11/EHMT2/FOXO1/EIF4E2/TSC2/TP53/ADCY3/HRAS/IGF1R/NFKB1/INSR/EIF4EBP1/ADCY4/IRS2/LOC106509647/SESN2/PRKAB2/SOD2/ADCY9/PIK3R2	ssc:100126861/ssc:100144302/ssc:100124382/ssc:100144516/ssc:396633/ssc:100135665/ssc:100512213/ssc:100124382/ssc:397077/ssc:100101924/ssc:100505408/ssc:397276/ssc:100514402/ssc:100739349/ssc:397350/ssc:751869/ssc:397350/ssc:100627508/ssc:100152067/ssc:100512686/ssc:100515824/ssc:100620966/ssc:100157793/ssc:100154319/ssc:100625423/ssc:100739510	26
ssc04210	cell processing	cell growth and daeth	Apoptosis	39/1168	136/6302	0.00234985	0.0380923	100620983/733594/100126861/397266/100126859/100127131/100513342/100621034/100621090/100144302/100628179/100523126/100512831/396633/100135665/397276/397393/100521118/396913/100513840/397278/110260411/100135051/100620838/100517403/397543/397027/110259208/100155596/751869/100514888/110261009/100525505/397020/406188/733669/397086/100524751/100739510	LMNB2/TUBA1B/AKT1/BIRC5/LMNA/LOC100127131/LMNB1/PARP1/GADD45B/ATF4/DAB2IP/DFFA/HTRA2/BAX/RELA/TP53/CAPN2/CASP2/JUN/TRAF2/PMAIP1/MAPK15/TUBA1A/PARP3/BBC3/BAK1/CAPN1/HRAS/HRK/NFKB1/ENDOG/FOSB/MAP2K2/TNFRSF1A/NFKBIA/GADD45A/TNF/RIPK1/PIK3R2	ssc:100620983/ssc:733594/ssc:100126861/ssc:397266/ssc:100126859/ssc:100127131/ssc:100513342/ssc:100621034/ssc:100621090/ssc:100144302/ssc:100628179/ssc:100523126/ssc:100512831/ssc:396633/ssc:100135665/ssc:397276/ssc:397393/ssc:100521118/ssc:396913/ssc:100513840/ssc:397278/ssc:100153927/ssc:100135051/ssc:100620838/ssc:100517403/ssc:397543/ssc:397027/ssc:100739349/ssc:100155596/ssc:751869/ssc:10051…	39
