# Supplementary material for: Foot-and-mouth disease virus VP1 promotes viral replication by regulating the expression of chemokines and GBP1
Source: Front Vet Sci. 2022 Jul 22;9:937409. doi: 10.3389/fvets.2022.937409 (PMC9353127; doi:10.3389/fvets.2022.937409)
Supplement: Supplementary file 4 [file Table_4.XLSX]

## Sheet: qRT-PCR
Table S4. Comparison of fold changes of DEGs between VP1 transfected cells and negative controls by qRT-PCR
Gene_id	Log2FoldChange	p-value	Immune-related genes	Gene_name	Gene_description	Gene_function
397422	0.967078	8.90537e-07	Yes	CCL2	chemokine (C-C motif) ligand 2	it is the typical inflammatory chemokine and binds to chemokine receptors CCR2 and CCR4；NOD-like receptor signaling pathway，Chemokine signaling pathway
396668	1.40592	0.0419673	Yes	CCL4	C-C motif chemokine ligand 4	it has inflammatory functions and binds to CCR5；Toll-like receptor signaling pathway，Chemokine signaling pathway
396613	0.624972	0.00401638	Yes	CCL5	C-C motif chemokine ligand 5	it functions as one of the natural ligands for the chemokine receptor chemokine (C-C motif) receptor 5 (CCR5), and it suppresses in vitro replication of the R5 strains of HIV-1, which use CCR5 as a coreceptor；NOD-like receptor signaling pathway，Toll-like receptor signaling pathway；Chemokine signaling pathway
396880	0.564552	0.0135438	Yes	CXCL8	C-X-C motif chemokine ligand 8	CXCL8 is a major mediator of the inflammatory response, also known as interleukin-8 (IL-8)；It functions as a chemotactic factor by guiding the neutrophils to the site of infection；Chemokine signaling pathway
494019	3.84774	0.000666317	Yes	CXCL10	C-X-C motif chemokine ligand 10	CXCL10 is a pro-inflammatory cytokine involved in multiple processes and during viral infection by stimulating the activation and migration of immune cells to the site of infection；Toll-like receptor signaling pathway，Chemokine signaling pathway
397276	0.434024	0.0257906	No	TP53	tumor protein p53	the encoded protein responds to regulate expression of target genes, thereby inducing cell cycle arrest, apoptosis, senescence, DNA repair；MAPK signaling pathway，p53 signaling pathway
396752	0.606611	0.0010773	Yes	RSAD2	radical S-adenosyl methionine domain containing 2	the encoded protein is an interferon-inducible antiviral protein that plays a role in cellular antiviral response and innate immune signaling；Hepatitis C
100515208	0.259059	0.337187	No	GSK3A	glycogen synthase kinase 3 alpha%2C transcript variant X1	this gene encodes a multifunctional Ser/Thr protein kinase that is implicated in the control of several regulatory proteins including glycogen synthase, and transcription factors；Chemokine signaling pathway
100126852	-0.405333	0.0211909	Yes	GSK3B	glycogen synthase kinase 3 beta%2C transcript variant X2	it is involved in inflammation, ER-stress, mitochondrial dysfunction, and apoptotic pathways；Chemokine signaling pathway
100125828	-0.230335	0.0153664	Yes	TBK1	TANK binding kinase 1%2C transcript variant X1	it can mediate NFKB activation in response to certain growth factors and is also an important kinase for antiviral innate immunity response；NOD-like receptor signaling pathway，Toll-like receptor signaling pathway
397668	-0.244248	0.0171691	Yes	AREG	amphiregulin	the protein interacts with the EGF/TGF-alpha receptor to promote the growth of normal epithelial cells, and it inhibits the growth of certain aggressive carcinoma cell lines；MAPK signaling pathway
397645	-0.705618	0.00523553	No	SAT1	spermidine/spermine N1-acetyltransferase 1	the protein encoded by this gene belongs to the acetyltransferase family；Arginine and proline metabolism
100620969	-0.559635	0.0323409	Yes	EREG	epiregulin	the encoded protein may be involved in a wide range of biological processes including inflammation and cell proliferation；MAPK signaling pathway
397121	-0.407626	0.244249	No	PLAT	plasminogen activator%2C tissue type	this gene encodes tissue-type plasminogen activator, a secreted serine protease；Transcriptional misregulation in cancer
396945	-0.586353	0.00487457	No	SERPINE1	serpin family E member 1	this gene encodes a member of the serine proteinase inhibitor (serpin) aasuperfamily and is a component of innate antiviral immunity；p53 signaling pathway
110255177	-1.71664	0.000719383	No	SLC5A3	solute carrier family 5 member 3	transmembrane transporter binding activity；Ribosome
100151938	-3.97704	0.000700181	Yes	GBP1	guanylate binding protein 1%2C interferon-inducible%2C transcript variant X1	GBP1 interferon inducible GTPase converting GTP to GMP, mediating an antiviral effect against stomatites virus and encephalomyocarditis virus.；NOD-like receptor signaling pathway

## Sheet: RNA-seq
Table S4. Comparison of fold changes of DEGs between VP1 transfected cells and negative controls by RNA-Seq
Gene_id	Log2FoldChange	p-value	padj-value	Up/Down Regulated*	Gene_name	Gene_description
397422	2.06844	5.96394e-09	6.56391e-08	1	CCL2	chemokine (C-C motif) ligand 2
396668	1.78716	5.21821e-51	1.63252e-48	1	CCL4	C-C motif chemokine ligand 4
396613	0.136298	0.00372533	0.0124212	1	CCL5	C-C motif chemokine ligand 5
396880	0.66337	3.62076e-11	5.5458e-10	1	CXCL8	C-X-C motif chemokine ligand 8
494019	1.19746	5.14291e-33	6.63345e-31	1	CXCL10	C-X-C motif chemokine ligand 10
397276	0.519803	2.47086e-06	1.73172e-05	1	TP53	tumor protein p53
396752	0.716137	8.93607e-56	3.75417e-53	1	RSAD2	radical S-adenosyl methionine domain containing 2
100515208	1.06426	9.56747e-58	4.53807e-55	1	GSK3A	glycogen synthase kinase 3 alpha%2C transcript variant X1
100126852	-0.214726	0.00880835	0.0260705	-1	GSK3B	glycogen synthase kinase 3 beta%2C transcript variant X2
100125828	-0.486142	7.89404e-09	8.56003e-08	-1	TBK1	TANK binding kinase 1%2C transcript variant X1
397668	-2.39723	9.28576e-135	1.95054e-131	-1	AREG	amphiregulin
397645	-0.775532	4.73598e-69	3.66515e-66	-1	SAT1	spermidine/spermine N1-acetyltransferase 1
100620969	-0.87656	1.65676e-25	1.11747e-23	-1	EREG	epiregulin
397121	-1.01044	6.02492e-115	1.10738e-111	-1	PLAT	plasminogen activator%2C tissue type
396945	-1.36133	2.21414e-71	2.03479e-68	-1	SERPINE1	serpin family E member 1
110255177	-1.39294	1.3074e-28	1.25647e-26	-1	SLC5A3	solute carrier family 5 member 3
100151938	-0.338204	3.95121e-08	3.84504e-07	-1	GBP1	guanylate binding protein 1%2C interferon-inducible%2C transcript variant X1
Note: DEGs cutoff: log2|FC| ≥ 0 and padj＜0.05; * 1 stands for up-regulated gene, and -1 meas down-regulated gene.
